# Supplementary material for: Silver-promoted decarboxylative amidation of α-keto acids with amines
Source: Royal Society of Chemistry journal article supplement (doi:10.1039/c6ob01963c), 2016-01-01

# Supporting Information

## Silver-Promoted Decarboxylative Amidation of $\alpha$ -Keto Acids with Amines

Xiao-Lan Xu,<sup>a,c</sup> ‡ Wen-Tao Xu,<sup>b</sup> ‡ Ji-Wei Wu,<sup>a</sup> Jian-Bo He,<sup>\*a</sup> Hua-Jian Xu<sup>\*b</sup>

<sup>a</sup> School of Chemistry and Chemical Engineering, Hefei University of Technology, Hefei 230009,  
P. R. China

<sup>b</sup> School of Biological and Medical Engineering, Hefei University of Technology, Key Laboratory  
of Advanced Functional Materials and Devices of Anhui Province, Hefei 230009, P. R. China

<sup>c</sup> School of Medical Science, Anhui Medical University, Hefei 230026, P. R. China

‡ These authors contributed equally to this work

E-mail: [hjxu@hfut.edu.cn](mailto:hjxu@hfut.edu.cn), [jbhe@hfut.edu.cn](mailto:jbhe@hfut.edu.cn)

## Table of Contents

|                                                                       |    |
|-----------------------------------------------------------------------|----|
| 1. General Information and Materials. ....                            | 3  |
| 2. Preparation of substrates. ....                                    | 3  |
| 3. General procedure for decarboxylative amidation. ....              | 3  |
| 4. Investigation of the key reaction parameters ....                  | 3  |
| 5. Characterization of products. ....                                 | 5  |
| 6. $^1\text{H}$ NMR and $^{13}\text{C}$ NMR spectra of products. .... | 13 |

## 1. General Information and Materials.

All the reactions were conducted in oven-dried Schlenk tubes. All solvents were obtained from commercial suppliers and used without further purification. Flash column chromatographic purification of products was accomplished using forced-flow chromatography on Silica Gel (200-300 mesh).  $^1\text{H}$  NMR and  $^{13}\text{C}$  NMR spectra were recorded on a 600 MHz spectrometer in  $\text{CDCl}_3$  and  $(\text{CD}_3)_2\text{SO}$ . Data for  $^1\text{H}$  NMR are reported as follows: chemical shift (ppm, scale), multiplicity, coupling constant (Hz), and integration. Data for  $^{13}\text{C}$  NMR are reported in terms of chemical shift (ppm, scale), multiplicity, and coupling constant (Hz).

## 2. Preparation of substrates.

Benzoylformic acid, 3,3-dimethyl-2-oxobutanoic acid and pyruvic acid were obtained from commercial suppliers. The other  $\alpha$ -keto acids were prepared from oxidation of corresponding methyl ketones by  $\text{SeO}_2$  according to the reported procedure. (K. Wadhwa, C. Yang, P. R. West, K. C. Deming, S. R. Chemburkar and R. E. Reddy, *Synth. Commun.*, 2008, 38, 4434.)

## 3. General procedure for decarboxylative amidation.

$\alpha$ -keto acid (0.25 mmol), amine (0.375 mmol),  $\text{AgOTf}$  (0.5 mmol) were placed in a transparent Schlenk tube equipped with a stirring bar. The solvents  $\text{CH}_3\text{CN}$  (1.3 mL) and  $\text{H}_2\text{O}$  (0.7 mL) were added under air atmosphere. The reaction mixture was stirred at 60 °C for 24 h. After 24 h, the mixture was quenched with saturated sodium bicarbonate (10 mL) and extracted with ethyl acetate (3 x 10 mL). The organic layers were combined and concentrated under vacuo. The product was purified by flash column chromatography on silica gel (petroleum ether : ethyl acetate).

## 4. Investigation of the key reaction parameters

### 4.1 The study of persulfates

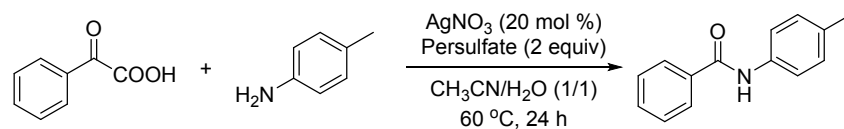

| entry | Catalyst<br>(0.2 equiv) | Persulfate<br>(2 equiv)               | Temp. (°C) | Time (h) | Yield<br>(%) |
|-------|-------------------------|---------------------------------------|------------|----------|--------------|
| 1     | $\text{AgNO}_3$         | $\text{K}_2\text{S}_2\text{O}_8$      | 60         | 24       | 9            |
| 2     | $\text{AgNO}_3$         | $\text{Na}_2\text{S}_2\text{O}_8$     | 60         | 24       | 11           |
| 3     | $\text{AgNO}_3$         | $(\text{NH}_4)_2\text{S}_2\text{O}_8$ | 60         | 24       | 10           |
| 4     | $\text{AgNO}_3$         | -                                     | 60         | 24       | 8            |

Firstly, we examined various persulfates like  $\text{K}_2\text{S}_2\text{O}_8$ ,  $\text{Na}_2\text{S}_2\text{O}_8$ , and  $(\text{NH}_4)_2\text{S}_2\text{O}_8$  with  $\text{AgNO}_3$

(entry 1-3). Interesting, the control experiment without persulfate (entry 4) gave the similar yield with those experiments added persulfate. So it suggest that 2 equiv of persulfate did not lead to a high yield.

#### 4.2 The study of temperature

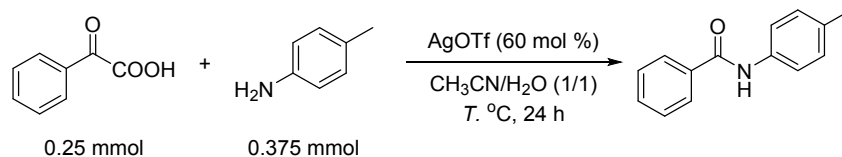

| entry | Catalyst<br>(0.6 equiv) | Temp. (°C) | Time (h) | Yield (%) |
|-------|-------------------------|------------|----------|-----------|
| 1     | AgOTf                   | rt         | 24       | trace     |
| 2     | AgOTf                   | 40         | 24       | 27        |
| 3     | AgOTf                   | 60         | 24       | 50        |
| 4     | AgOTf                   | 80         | 24       | 39        |

These experiments under different temperature were conducted (entries 1-4). And the results released that 60 °C was the most suitable temperature.

#### 4.3 The study of reaction time

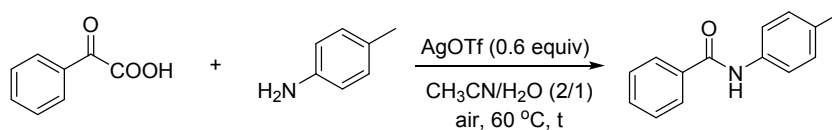

| entry | Time (h) | Yield (%) |
|-------|----------|-----------|
| 1     | 12       | 50        |
| 2     | 24       | 55        |
| 3     | 36       | 56        |

#### 4.4 Protection atmosphere

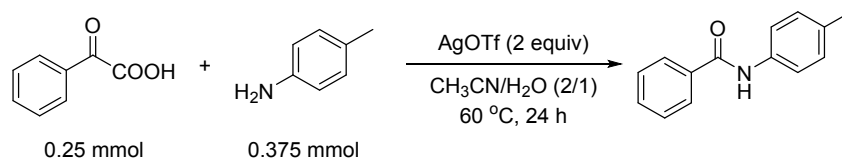

| entry | Catalyst<br>(2.0 equiv) | Atmosphere     | Time (h) | Yield (%) |
|-------|-------------------------|----------------|----------|-----------|
| 1     | AgOTf                   | N <sub>2</sub> | 24       | 16        |
| 2     | AgOTf                   | air            | 24       | 87        |
| 3     | AgOTf                   | O <sub>2</sub> | 24       | 89        |

## 5. Characterization of products.

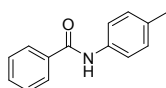

N-(p-tolyl)benzamide (**3a**).<sup>1</sup> Following general procedure, the product was purified by flash column chromatography on silica gel (PE/EA = 10:1), obtained in 87% yield as a white solid (45.9 mg). <sup>1</sup>H NMR (600 MHz, CDCl<sub>3</sub>) δ 7.95 (s, 1H), 7.85 (d, *J* = 7.6 Hz, 2H), 7.52 (t, *J* = 6.5 Hz, 3H), 7.44 (t, *J* = 7.5 Hz, 2H), 7.15 (d, *J* = 8.0 Hz, 2H), 2.34 (s, 3H). <sup>13</sup>C NMR (151 MHz, CDCl<sub>3</sub>) δ 165.69, 135.36, 135.04, 134.15, 131.62, 129.49, 128.64, 126.99, 120.35, 20.86.

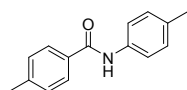

4-methyl-N-(p-tolyl)benzamide (**3b**).<sup>1</sup> Following general procedure, the product was purified by flash column chromatography on silica gel (PE/EA = 10:1), obtained in 79% yield as a white solid (44.5 mg). <sup>1</sup>H NMR (600 MHz, CDCl<sub>3</sub>) δ 7.88 (s, 1H), 7.75 (d, *J* = 8.1 Hz, 2H), 7.52 (d, *J* = 8.4 Hz, 2H), 7.24 (d, *J* = 7.9 Hz, 2H), 7.15 (d, *J* = 8.2 Hz, 2H), 2.41 (s, 3H), 2.33 (s, 3H). <sup>13</sup>C NMR (151 MHz, CDCl<sub>3</sub>) δ 165.60, 142.10, 135.47, 133.97, 132.16, 129.46, 129.30, 126.99, 120.28, 21.42, 20.85.

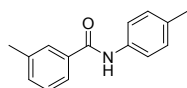

3-methyl-N-(p-tolyl)benzamide (**3c**).<sup>2</sup> Following general procedure, the product was purified by flash column chromatography on silica gel (PE/EA = 10:1), obtained in 75% yield as a white solid (44.2 mg). <sup>1</sup>H NMR (600 MHz, CDCl<sub>3</sub>) δ 7.96 (s, 1H), 7.67 (s, 1H), 7.62 (s, 1H), 7.52 (d, *J* = 8.3 Hz, 2H), 7.32 (d, *J* = 3.9 Hz, 2H), 7.15 (d, *J* = 8.0 Hz, 2H), 2.39 (s, 3H), 2.34 (s, 3H). <sup>13</sup>C NMR (151 MHz, CDCl<sub>3</sub>) δ 165.88, 138.50, 135.43, 135.02, 134.02, 132.33, 129.45, 128.47, 127.75, 123.92, 120.32, 21.29, 20.84.

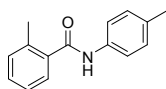

2-methyl-N-(p-tolyl)benzamide (**3d**).<sup>2</sup> Following general procedure, the product was purified by flash column chromatography on silica gel (PE/EA = 10:1), obtained in 48% yield as a white solid (27.0 mg). <sup>1</sup>H NMR (600 MHz, CDCl<sub>3</sub>) δ 7.49 (d, *J* = 8.0 Hz, 2H), 7.46 (d, *J* = 7.4 Hz, 2H), 7.34 (t, *J* = 7.5 Hz, 1H), 7.27 – 7.21 (m, 2H), 7.16 (d, *J* = 7.9 Hz, 2H), 2.49 (s, 3H), 2.34 (s, 3H). <sup>13</sup>C

NMR (151 MHz, CDCl<sub>3</sub>)  $\delta$  167.92, 136.56, 136.37, 135.41, 134.18, 131.19, 130.15, 129.54, 126.57, 125.84, 119.92, 20.87, 19.78.

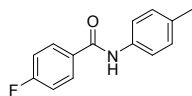

4-fluoro-N-(p-tolyl)benzamide (**3e**).<sup>3</sup> Following general procedure, the product was purified by flash column chromatography on silica gel (PE/EA = 10:1), obtained in 46% yield as a white solid (26.4 mg). <sup>1</sup>H NMR (600 MHz, (CD<sub>3</sub>)<sub>2</sub>SO)  $\delta$  10.19 (s, 1H), 8.03 (dd, *J* = 8.3, 5.7 Hz, 2H), 7.65 (d, *J* = 8.2 Hz, 2H), 7.35 (t, *J* = 8.7 Hz, 2H), 7.15 (d, *J* = 8.2 Hz, 2H), 2.27 (s, 3H). <sup>13</sup>C NMR (151 MHz, (CD<sub>3</sub>)<sub>2</sub>SO)  $\delta$  164.21, 164.00 (d, *J* = 248.8 Hz), 136.54, 132.68, 131.45 (d, *J* = 2.9 Hz), 130.32 (d, *J* = 9.0 Hz), 129.00, 120.42, 115.28 (d, *J* = 21.8 Hz), 20.50.

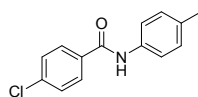

4-chloro-N-(p-tolyl)benzamide (**3f**).<sup>1</sup> Following general procedure, the product was purified by flash column chromatography on silica gel (PE/EA = 10:1), obtained in 66% yield as a white solid (40.5 mg). <sup>1</sup>H NMR (600 MHz, (CD<sub>3</sub>)<sub>2</sub>SO)  $\delta$  10.24 (s, 1H), 7.98 (d, *J* = 8.3 Hz, 2H), 7.65 (d, *J* = 8.2 Hz, 2H), 7.59 (d, *J* = 8.3 Hz, 2H), 7.15 (d, *J* = 8.2 Hz, 2H), 2.27 (s, 3H). <sup>13</sup>C NMR (151 MHz, (CD<sub>3</sub>)<sub>2</sub>SO)  $\delta$  164.19, 136.44, 136.29, 133.70, 132.78, 129.56, 129.00, 128.40, 120.43, 20.50.

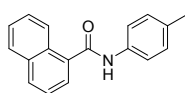

N-(p-tolyl)-1-naphthamide (**3g**).<sup>4</sup> Following general procedure, the product was purified by flash column chromatography on silica gel (PE/EA = 4:1), obtained in 43% yield as a white solid (28.1 mg). <sup>1</sup>H NMR (600 MHz, CDCl<sub>3</sub>)  $\delta$  8.35 (d, *J* = 7.4 Hz, 1H), 7.94 (d, *J* = 8.3 Hz, 1H), 7.89 (d, *J* = 9.5 Hz, 1H), 7.71 (d, *J* = 7.2 Hz, 2H), 7.56 (dd, *J* = 12.5, 5.6 Hz, 4H), 7.48 (t, *J* = 7.6 Hz, 1H), 7.20 (d, *J* = 8.1 Hz, 2H), 2.36 (s, 3H). <sup>13</sup>C NMR (151 MHz, CDCl<sub>3</sub>)  $\delta$  167.41, 135.46, 134.32, 133.73, 130.90, 130.07, 129.60, 129.56, 128.37, 127.28, 126.53, 125.28, 125.00, 124.71, 120.03, 20.91.

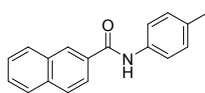

N-(p-tolyl)-2-naphthamide (**3h**).<sup>1</sup> Following general procedure, the product was purified by flash column chromatography on silica gel (PE/EA = 10:1), obtained in 80% yield as a white solid (52.3 mg). <sup>1</sup>H NMR (600 MHz, (CD<sub>3</sub>)<sub>2</sub>SO)  $\delta$  10.39 (s, 1H), 8.59 (s, 1H), 8.09 (d, *J* = 7.6 Hz, 1H), 8.04

(s, 2H), 8.00 (d,  $J = 7.6$  Hz, 1H), 7.73 (d,  $J = 8.2$  Hz, 2H), 7.65 – 7.59 (m, 2H), 7.18 (d,  $J = 8.1$  Hz, 2H), 2.29 (s, 3H).  $^{13}\text{C}$  NMR (151 MHz,  $(\text{CD}_3)_2\text{SO}$ )  $\delta$  165.38, 136.72, 134.21, 132.62, 132.36, 132.09, 129.03, 128.92, 127.96, 127.87, 127.74, 127.65, 126.80, 124.46, 120.38, 20.51.

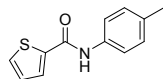

N-(p-tolyl)thiophene-2-carboxamide (**3i**).<sup>1</sup> Following general procedure, the product was purified by flash column chromatography on silica gel (PE/EA = 10:1), obtained in 57% yield as a yellow solid (31.0 mg).  $^1\text{H}$  NMR (600 MHz,  $\text{CDCl}_3$ )  $\delta$  7.69 (s, 1H), 7.62 (d,  $J = 3.4$  Hz, 1H), 7.52 (d,  $J = 4.8$  Hz, 1H), 7.49 (d,  $J = 8.3$  Hz, 2H), 7.16 (d,  $J = 8.1$  Hz, 2H), 7.13 – 7.09 (m, 1H), 2.33 (s, 3H).  $^{13}\text{C}$  NMR (151 MHz,  $\text{CDCl}_3$ )  $\delta$  159.83, 139.36, 135.00, 134.30, 130.52, 129.58, 128.33, 127.75, 120.31, 20.88.

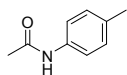

N-(p-tolyl)acetamide (**3j**).<sup>1</sup> Following general procedure, the product was purified by flash column chromatography on silica gel (PE/EA = 5:1), obtained in 49% yield as a white solid (18.3 mg).  $^1\text{H}$  NMR (600 MHz,  $(\text{CD}_3)_2\text{SO}$ )  $\delta$  9.83 (s, 1H), 7.45 (d,  $J = 8.2$  Hz, 2H), 7.08 (d,  $J = 8.2$  Hz, 2H), 2.23 (s, 3H), 2.01 (s, 3H).  $^{13}\text{C}$  NMR (151 MHz,  $(\text{CD}_3)_2\text{SO}$ )  $\delta$  167.99, 136.83, 131.79, 129.02, 118.96, 23.94, 20.43.

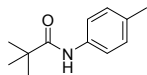

N-(p-tolyl)pivalamide (**3k**).<sup>3</sup> Following general procedure, the product was purified by flash column chromatography on silica gel (PE/EA = 20:1), obtained in 61% yield as an off-white solid (29.2 mg).  $^1\text{H}$  NMR (600 MHz,  $\text{CDCl}_3$ )  $\delta$  7.40 (d,  $J = 8.4$  Hz, 2H), 7.28 (s, 1H), 7.11 (d,  $J = 8.3$  Hz, 2H), 2.31 (s, 3H), 1.31 (s, 9H).  $^{13}\text{C}$  NMR (151 MHz,  $\text{CDCl}_3$ )  $\delta$  176.39, 135.45, 133.72, 129.37, 120.02, 39.48, 27.62, 20.79.

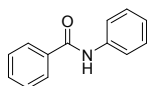

N-phenylbenzamide (**3l**).<sup>1</sup> Following general procedure, the product was purified by flash column chromatography on silica gel (PE/EA = 10:1), obtained in 56% yield as a white solid (27.6 mg).  $^1\text{H}$  NMR (600 MHz,  $\text{CDCl}_3$ )  $\delta$  7.89 (s, 1H), 7.87 (d,  $J = 7.7$  Hz, 2H), 7.64 (d,  $J = 8.0$  Hz, 2H), 7.55 (t,  $J = 7.3$  Hz, 1H), 7.48 (t,  $J = 7.6$  Hz, 2H), 7.37 (t,  $J = 7.8$  Hz, 2H), 7.15 (t,  $J = 7.4$  Hz, 1H).  $^{13}\text{C}$  NMR (151 MHz,  $\text{CDCl}_3$ )  $\delta$  165.75, 137.88, 134.96, 131.82, 129.07, 128.76, 126.99, 124.56,

120.19.

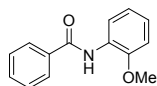

N-(2-methoxyphenyl)benzamide (**3m**).<sup>1</sup> Following general procedure, the product was purified by flash column chromatography on silica gel (PE/EA = 10:1), obtained in 60% yield as a colorless liquid (34.1 mg). <sup>1</sup>H NMR (600 MHz, (CD<sub>3</sub>)<sub>2</sub>SO) δ 9.44 (s, 1H), 7.97 (d, *J* = 7.6 Hz, 2H), 7.79 (d, *J* = 7.8 Hz, 1H), 7.59 (t, *J* = 7.3 Hz, 1H), 7.53 (t, *J* = 7.6 Hz, 2H), 7.19 (t, *J* = 7.8 Hz, 1H), 7.09 (d, *J* = 8.1 Hz, 1H), 6.98 (t, *J* = 7.6 Hz, 1H), 3.83 (s, 3H). <sup>13</sup>C NMR (151 MHz, (CD<sub>3</sub>)<sub>2</sub>SO) δ 164.95, 151.46, 134.50, 131.62, 128.50, 127.46, 126.81, 125.71, 124.28, 120.20, 111.36, 55.71.

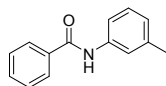

N-(m-tolyl)benzamide (**3n**).<sup>2</sup> Following general procedure, the product was purified by flash column chromatography on silica gel (PE/EA = 10:1), obtained in 77% yield as a white solid (40.7 mg). <sup>1</sup>H NMR (600 MHz, CDCl<sub>3</sub>) δ 7.92 (s, 1H), 7.86 (d, *J* = 7.7 Hz, 2H), 7.55 – 7.50 (m, 2H), 7.46 (t, *J* = 7.6 Hz, 2H), 7.42 (d, *J* = 8.0 Hz, 1H), 7.24 (t, *J* = 7.8 Hz, 1H), 6.96 (d, *J* = 7.6 Hz, 1H), 2.35 (s, 3H). <sup>13</sup>C NMR (151 MHz, CDCl<sub>3</sub>) δ 165.73, 138.95, 137.83, 135.03, 131.70, 128.83, 128.69, 126.98, 125.33, 120.89, 117.31, 21.45.

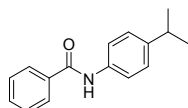

N-(4-isopropylphenyl)benzamide (**3o**).<sup>3</sup> Following general procedure, the product was purified by flash column chromatography on silica gel (PE/EA = 10:1), obtained in 66% yield as a white solid (39.5 mg). <sup>1</sup>H NMR (600 MHz, (CD<sub>3</sub>)<sub>2</sub>SO) δ 10.19 (s, 1H), 7.95 (d, *J* = 7.6 Hz, 2H), 7.69 (d, *J* = 8.3 Hz, 2H), 7.58 (t, *J* = 7.2 Hz, 1H), 7.52 (t, *J* = 7.6 Hz, 2H), 7.22 (d, *J* = 8.4 Hz, 2H), 2.86 (hept, *J* = 6.8 Hz, 1H), 1.20 (d, *J* = 6.9 Hz, 6H). <sup>13</sup>C NMR (151 MHz, (CD<sub>3</sub>)<sub>2</sub>SO) δ 165.31, 143.72, 136.91, 135.02, 131.44, 128.34, 127.60, 126.29, 120.45, 32.93, 23.98.

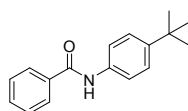

N-(4-tert-butylphenyl)benzamide (**3p**).<sup>1</sup> Following general procedure, the product was purified by flash column chromatography on silica gel (PE/EA = 10:1), obtained in 72% yield as a white solid (45.6 mg). <sup>1</sup>H NMR (600 MHz, (CD<sub>3</sub>)<sub>2</sub>SO) δ 10.20 (s, 1H), 7.96 (d, *J* = 7.7 Hz, 2H), 7.70 (d,



$J = 8.5$  Hz, 2H), 7.58 (t,  $J = 7.3$  Hz, 1H), 7.52 (t,  $J = 7.6$  Hz, 2H), 7.36 (d,  $J = 8.5$  Hz, 2H), 1.28 (s, 9H).  $^{13}\text{C}$  NMR (151 MHz,  $(\text{CD}_3)_2\text{SO}$ )  $\delta$  165.32, 145.96, 136.60, 135.01, 131.45, 128.34, 127.61, 125.19, 120.13, 34.05, 31.21.

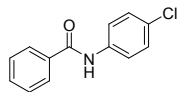

N-(4-chlorophenyl)benzamide (**3q**).<sup>3</sup> Following general procedure, the product was purified by flash column chromatography on silica gel (PE/EA = 10:1), obtained in 50% yield as a white solid (29.0 mg).  $^1\text{H}$  NMR (600 MHz,  $(\text{CD}_3)_2\text{SO}$ )  $\delta$  10.39 (s, 1H), 7.95 (d,  $J = 7.6$  Hz, 2H), 7.83 (d,  $J = 8.8$  Hz, 2H), 7.60 (t,  $J = 7.3$  Hz, 1H), 7.53 (t,  $J = 7.6$  Hz, 2H), 7.41 (d,  $J = 8.8$  Hz, 2H).  $^{13}\text{C}$  NMR (151 MHz,  $(\text{CD}_3)_2\text{SO}$ )  $\delta$  165.69, 138.17, 134.72, 131.74, 128.55, 128.45, 127.70, 127.28, 121.85.

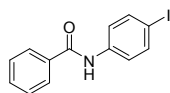

N-(4-iodophenyl)benzamide (**3r**).<sup>3</sup> Following general procedure, the product was purified by flash column chromatography on silica gel (PE/EA = 10:1), obtained in 40% yield as a white solid (32.3 mg).  $^1\text{H}$  NMR (600 MHz,  $(\text{CD}_3)_2\text{SO}$ )  $\delta$  10.34 (s, 1H), 7.94 (d,  $J = 7.7$  Hz, 2H), 7.69 (d,  $J = 8.7$  Hz, 2H), 7.64 (d,  $J = 8.7$  Hz, 2H), 7.60 (t,  $J = 7.3$  Hz, 1H), 7.53 (t,  $J = 7.6$  Hz, 2H).  $^{13}\text{C}$  NMR (151 MHz,  $(\text{CD}_3)_2\text{SO}$ )  $\delta$  165.65, 139.05, 137.27, 134.72, 131.72, 128.43, 127.68, 122.45, 87.35.

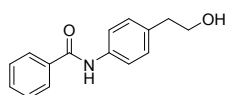

N-(4-(2-hydroxyethyl)phenyl)benzamide (**3s**).<sup>5</sup> Following general procedure, the product was purified by flash column chromatography on silica gel (PE/EA = 3:1), obtained in 84% yield as a yellow solid (47.7 mg).  $^1\text{H}$  NMR (600 MHz,  $\text{CDCl}_3$ )  $\delta$  7.90 (s, 1H), 7.86 (d,  $J = 7.5$  Hz, 2H), 7.55 (dd,  $J = 13.1, 7.7$  Hz, 3H), 7.48 (t,  $J = 6.7$  Hz, 2H), 7.22 (d,  $J = 8.3$  Hz, 2H), 3.85 (t,  $J = 6.5$  Hz, 2H), 2.86 (t,  $J = 6.5$  Hz, 2H).  $^{13}\text{C}$  NMR (151 MHz,  $\text{CDCl}_3$ )  $\delta$  165.84, 136.26, 134.93, 134.84, 133.57, 131.87, 130.13, 129.64, 128.78, 128.44, 127.03, 120.70, 119.40, 63.62, 38.57.

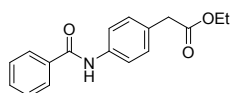

ethyl 2-(4-benzamidophenyl)acetate (**3t**). Following general procedure, the product was purified by flash column chromatography on silica gel (PE/EA = 10:1), obtained in 37% yield as a white solid (26.2 mg).  $^1\text{H}$  NMR (600 MHz,  $\text{CDCl}_3$ )  $\delta$  7.90 (s, 1H), 7.86 (d,  $J = 7.7$  Hz, 2H), 7.60 (d,  $J =$

8.1 Hz, 2H), 7.55 (t,  $J = 7.3$  Hz, 1H), 7.48 (t,  $J = 7.5$  Hz, 2H), 7.28 (d,  $J = 8.1$  Hz, 2H), 4.15 (q,  $J = 7.1$  Hz, 2H), 3.60 (s, 2H), 1.25 (t,  $J = 7.0$  Hz, 3H).  $^{13}\text{C}$  NMR (151 MHz,  $\text{CDCl}_3$ )  $\delta$  171.60, 165.70, 136.89, 134.90, 131.84, 130.33, 129.90, 128.77, 127.01, 120.38, 60.91, 40.86, 14.16.

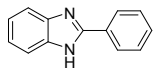

2-phenyl-1H-benzo[d]imidazole (**4a**).<sup>6</sup> Following general procedure, the product was purified by flash column chromatography on silica gel (PE/EA = 4:1), obtained in 80% yield as a yellow solid (38.8 mg).  $^1\text{H}$  NMR (600 MHz,  $(\text{CD}_3)_2\text{SO}$ )  $\delta$  12.58 (s, 1H), 8.30 (d,  $J = 8.2$  Hz, 2H), 7.84 (d,  $J = 8.0$  Hz, 1H), 7.54 (t,  $J = 7.7$  Hz, 1H), 7.50 (t,  $J = 7.4$  Hz, 3H), 7.35 – 7.31 (m, 2H).  $^{13}\text{C}$  NMR (151 MHz,  $(\text{CD}_3)_2\text{SO}$ )  $\delta$  154.57, 135.60, 132.04, 132.00, 130.30, 130.17, 129.18, 128.75, 127.84, 123.38, 115.08.

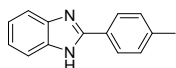

2-(p-tolyl)-1H-benzo[d]imidazole (**4b**).<sup>6</sup> Following general procedure, the product was purified by flash column chromatography on silica gel (PE/EA = 4:1), obtained in 83% yield as a yellow solid (40.5 mg).  $^1\text{H}$  NMR (600 MHz,  $(\text{CD}_3)_2\text{SO}$ )  $\delta$  12.83 (s, 1H), 8.08 (d,  $J = 8.1$  Hz, 2H), 7.64 (s, 1H), 7.51 (s, 1H), 7.35 (d,  $J = 7.9$  Hz, 2H), 7.19 (s, 2H), 2.37 (s, 3H).  $^{13}\text{C}$  NMR (151 MHz,  $(\text{CD}_3)_2\text{SO}$ )  $\delta$  151.36, 143.80, 139.52, 134.93, 129.48, 127.44, 126.36, 22.29, 21.52, 118.68, 111.16, 20.95.

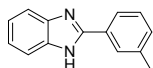

2-(m-tolyl)-1H-benzo[d]imidazole (**4c**).<sup>6</sup> Following general procedure, the product was purified by flash column chromatography on silica gel (PE/EA = 4:1), obtained in 87% yield as a white solid (45.3 mg).  $^1\text{H}$  NMR (600 MHz,  $(\text{CD}_3)_2\text{SO}$ )  $\delta$  12.67 (s, 1H), 7.75 (d,  $J = 7.3$  Hz, 1H), 7.70 (d,  $J = 7.5$  Hz, 1H), 7.53 (d,  $J = 7.4$  Hz, 1H), 7.38 (d,  $J = 6.3$  Hz, 3H), 7.21 (dt,  $J = 14.0, 7.2$  Hz, 2H), 2.62 (s, 3H).  $^{13}\text{C}$  NMR (151 MHz,  $(\text{CD}_3)_2\text{SO}$ )  $\delta$  151.98, 143.74, 137.06, 134.45, 131.32, 130.09, 129.49, 129.36, 126.02, 122.41, 121.45, 118.97, 111.31, 21.14.

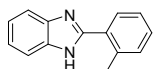

2-(o-tolyl)-1H-benzo[d]imidazole (**4d**).<sup>6</sup> Following general procedure, the product was purified by flash column chromatography on silica gel (PE/EA = 4:1), obtained in 86% yield as a white solid (44.8 mg).  $^1\text{H}$  NMR (600 MHz,  $(\text{CD}_3)_2\text{SO}$ )  $\delta$  12.94 (s, 1H), 8.06 (s, 1H), 8.00 (d,  $J = 7.3$  Hz, 1H), 7.57 (d,  $J = 42.9$  Hz, 2H), 7.42 (t,  $J = 7.5$  Hz, 1H), 7.28 (d,  $J = 7.3$  Hz, 1H), 7.21 (s, 2H), 2.40 (s,

3H).  $^{13}\text{C}$  NMR (151 MHz,  $(\text{CD}_3)_2\text{SO}$ )  $\delta$  151.40, 138.21, 132.09, 130.53, 130.14, 128.89, 127.07, 123.64, 115.14, 21.12.

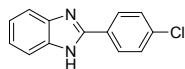

2-(4-chlorophenyl)-1H-benzo[d]imidazole (**4e**).<sup>6</sup> Following general procedure, the product was purified by flash column chromatography on silica gel (PE/EA = 4:1), obtained in 84% yield as a yellow solid (48.0 mg).  $^1\text{H}$  NMR (600 MHz,  $(\text{CD}_3)_2\text{SO}$ )  $\delta$  12.98 (s, 1H), 8.19 (d,  $J = 8.5$  Hz, 2H), 7.67 (d,  $J = 7.7$  Hz, 1H), 7.65 – 7.59 (m, 2H), 7.54 (d,  $J = 7.6$  Hz, 1H), 7.21 (dq,  $J = 14.5, 6.7$  Hz, 2H).  $^{13}\text{C}$  NMR (151 MHz,  $(\text{CD}_3)_2\text{SO}$ )  $\delta$  150.36, 134.77, 129.24, 129.06, 128.32, 122.62, 119.14, 111.62.

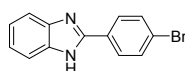

2-(4-bromophenyl)-1H-benzo[d]imidazole (**4f**).<sup>6</sup> Following general procedure, the product was purified by flash column chromatography on silica gel (PE/EA = 4:1), obtained in 83% yield as a yellow solid (56.7 mg).  $^1\text{H}$  NMR (600 MHz,  $(\text{CD}_3)_2\text{SO}$ )  $\delta$  13.01 (s, 1H), 8.12 (d,  $J = 8.5$  Hz, 2H), 7.77 (d,  $J = 8.5$  Hz, 2H), 7.67 (d,  $J = 7.5$  Hz, 1H), 7.54 (d,  $J = 7.4$  Hz, 1H), 7.22 (dd,  $J = 14.5, 7.5$  Hz, 2H).  $^{13}\text{C}$  NMR (151 MHz,  $(\text{CD}_3)_2\text{SO}$ )  $\delta$  150.20, 143.76, 135.02, 131.99, 129.38, 128.35, 123.25, 122.74, 121.81, 118.97, 111.42.

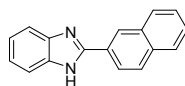

2-(naphthalen-2-yl)-1H-benzo[d]imidazole (**4g**).<sup>6</sup> Following general procedure, the product was purified by flash column chromatography on silica gel (PE/EA = 4:1), obtained in 90% yield as a yellow solid (55.0 mg).  $^1\text{H}$  NMR (600 MHz,  $(\text{CD}_3)_2\text{SO}$ )  $\delta$  13.09 (s, 1H), 8.76 (s, 1H), 8.34 (d,  $J = 8.5$  Hz, 1H), 8.08 (d,  $J = 8.7$  Hz, 1H), 8.05 (d,  $J = 6.2$  Hz, 1H), 7.98 (d,  $J = 6.6$  Hz, 1H), 7.65 (s, 1H), 7.63 – 7.53 (m, 3H), 7.24 (s, 2H).  $^{13}\text{C}$  NMR (151 MHz,  $(\text{CD}_3)_2\text{SO}$ )  $\delta$  151.23, 133.43, 132.79, 129.81, 128.49, 128.39, 127.74, 127.59, 127.04, 126.86, 125.79, 123.92, 122.20, 115.11.

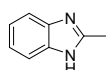

2-methyl-1H-benzo[d]imidazole (**4h**).<sup>7</sup> Following general procedure, the product was purified by flash column chromatography on silica gel (PE/EA = 50:1), obtained in 60% yield as a white solid (19.8 mg).  $^1\text{H}$  NMR (600 MHz,  $(\text{CD}_3)_2\text{SO}$ )  $\delta$  12.33 (s, 1H), 7.69 (d,  $J = 8.1$  Hz, 1H), 7.46 (t,  $J = 7.7$  Hz, 1H), 7.26 (t,  $J = 7.6$  Hz, 2H), 2.40 (s, 3H).  $^{13}\text{C}$  NMR (151 MHz,  $(\text{CD}_3)_2\text{SO}$ )  $\delta$  159.27,

154.97, 131.95, 129.37, 127.91, 123.09, 115.26, 20.62.

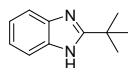

2-(tert-butyl)-1H-benzo[d]imidazole (**4i**).<sup>7</sup> Following general procedure, the product was purified by flash column chromatography on silica gel (PE/EA = 50:1), obtained in 90% yield as a white solid (39.2 mg). <sup>1</sup>H NMR (600 MHz, (CD<sub>3</sub>)<sub>2</sub>SO) δ 12.06 (s, 1H), 7.47 (s, 2H), 7.10 (dd, *J* = 5.8, 3.0 Hz, 2H), 1.40 (s, 9H). <sup>13</sup>C NMR (151 MHz, (CD<sub>3</sub>)<sub>2</sub>SO) δ 162.32, 140.04, 121.23, 119.07, 33.25, 29.33.

Reference:

1. J. Liu, Q. Liu, H. Yi, C. Qin, R. Bai, X. Qi, Y. Lan and A. Lei, *Angew. Chem., Int. Ed.*, 2014, **53**, 502.
2. J. Du, K. Luo and X. Zhang, *RSC Adv.*, 2014, **4**, 54539.
3. W. T. Xu, B. Huang, J. J. Dai, J. Xu and H. J. Xu, *Org. Lett.*, 2016, **18**, 3114.
4. W. W. Fang, Q. Y. Deng, M. Z. Xu and T. Tu, *Org. Lett.*, 2013, **15**, 3678.
5. Y. J. Kang, H. A. Chung, J. J. Kim and Y. J. Yoon, *Synthesis*, 2002, 733.
6. D. Mahesh, P. Sadhu and T. Punniyamurthy, *J. Org. Chem.*, 2015, **80**, 1644.
7. J. Huang, Y. He, Y. Wang and Q. Zhu, *Chem. Eur. J.*, 2012, **18**, 13964.

6.  $^1\text{H}$  NMR and  $^{13}\text{C}$  NMR spectra of products.

### N-(p-tolyl)benzamide (3a)

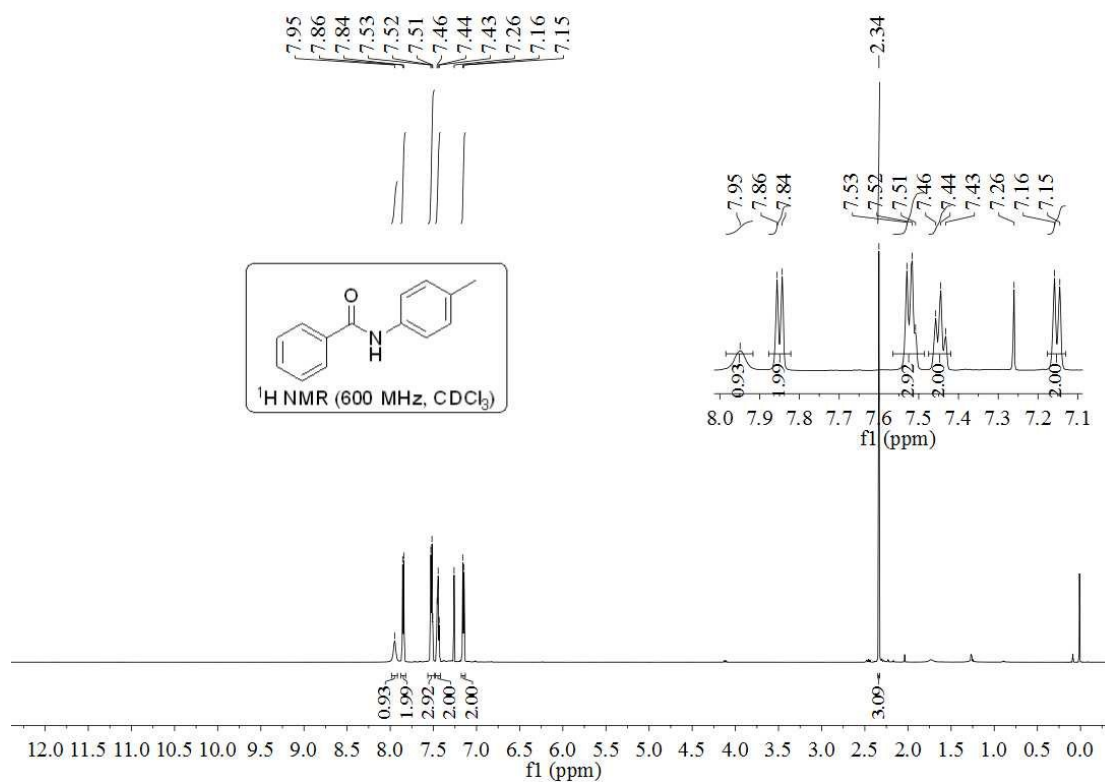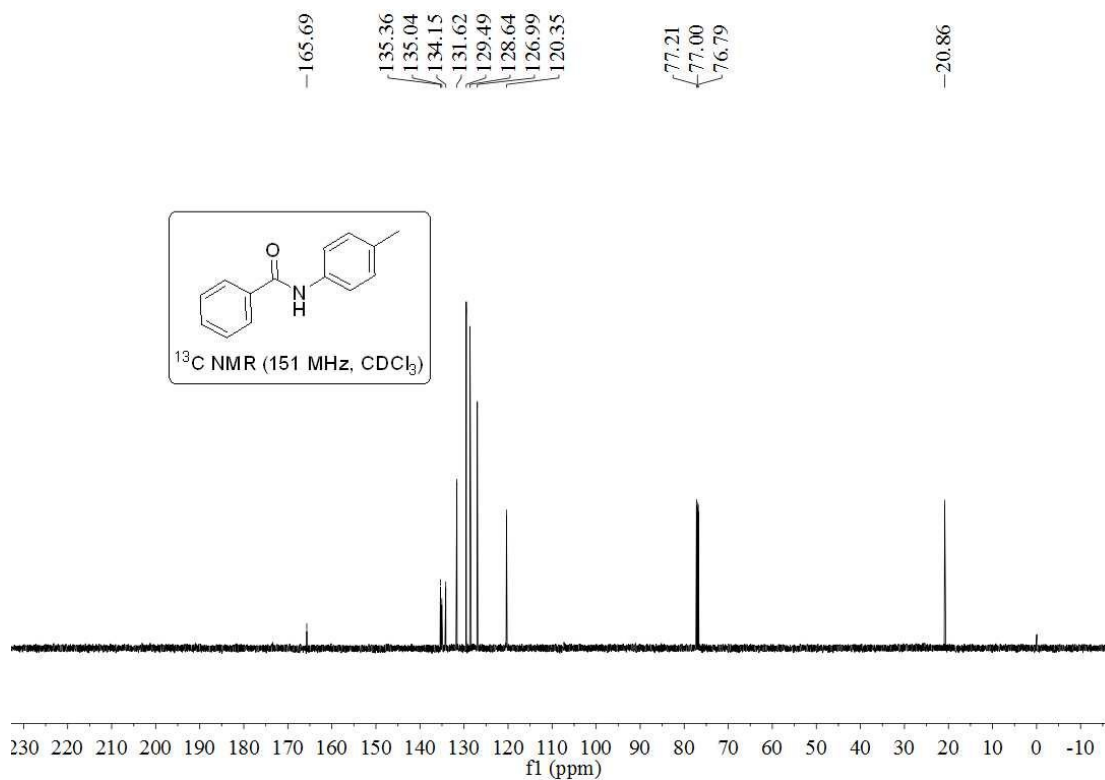

### 4-methyl-N-(p-tolyl)benzamide (3b)

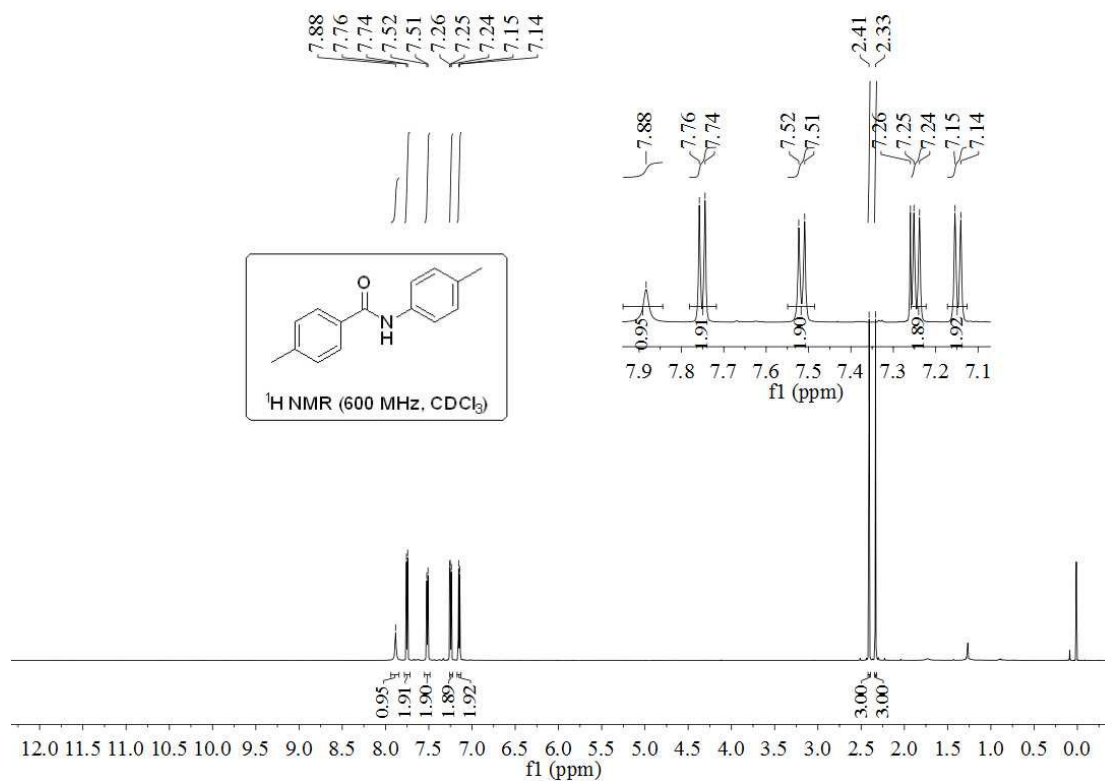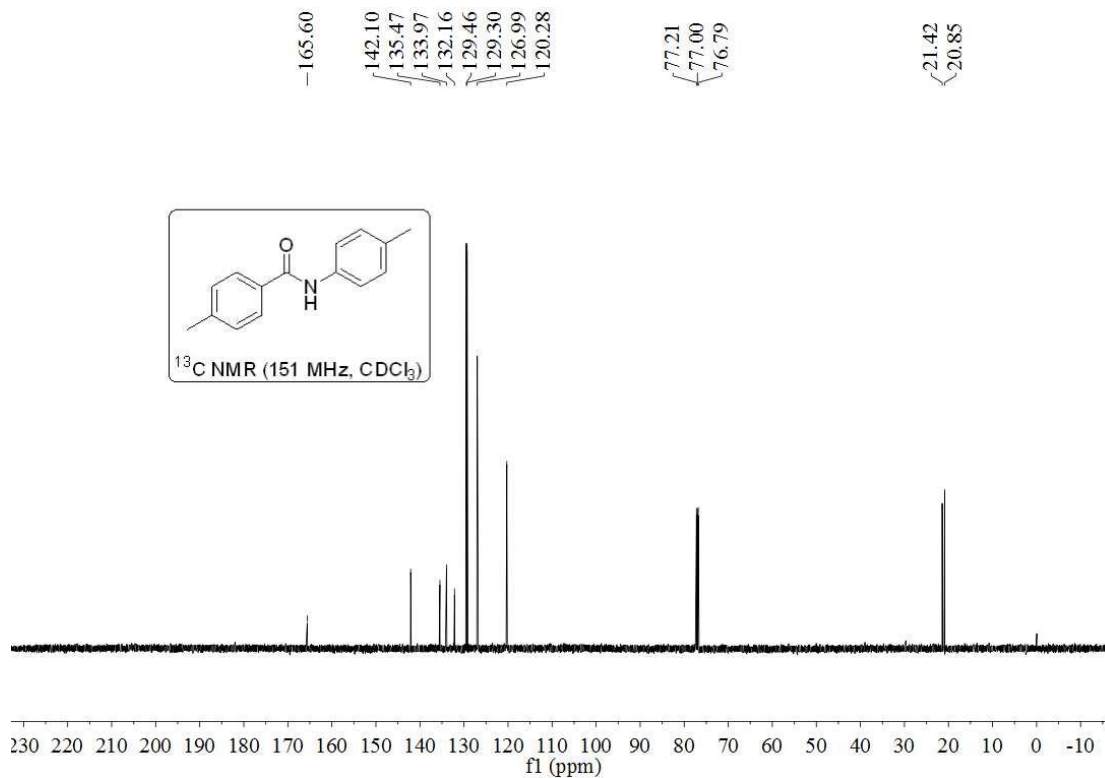

### 3-methyl-N-(p-tolyl)benzamide (3c)

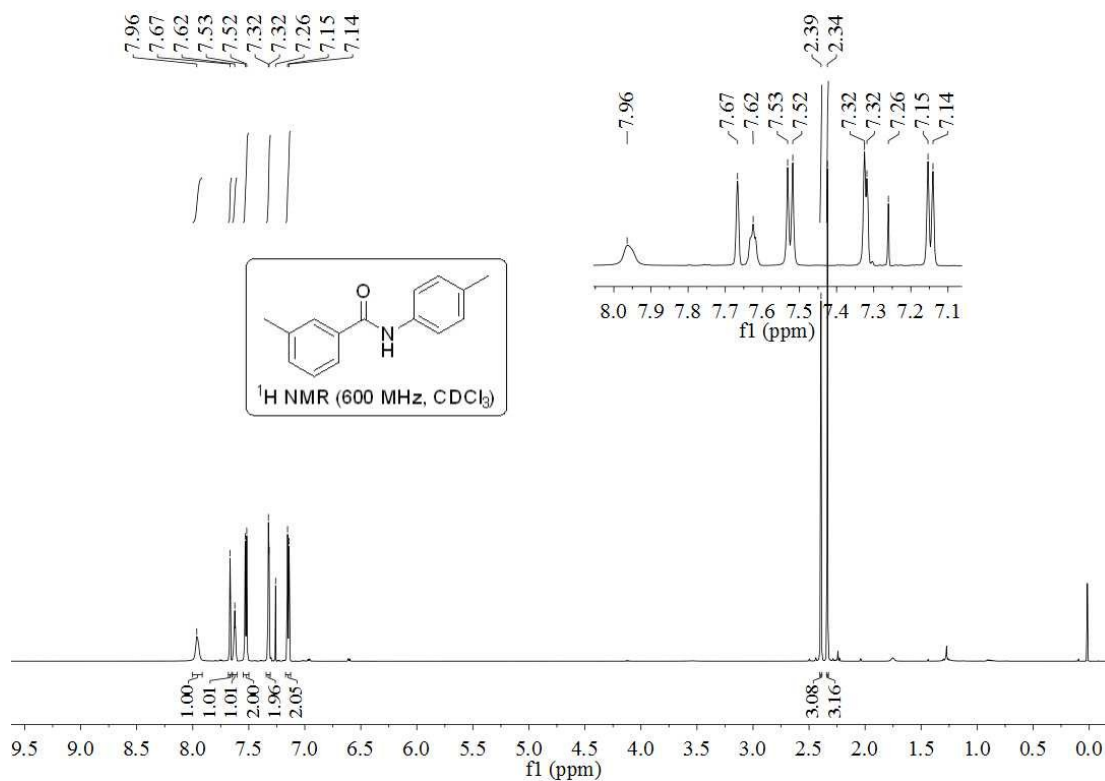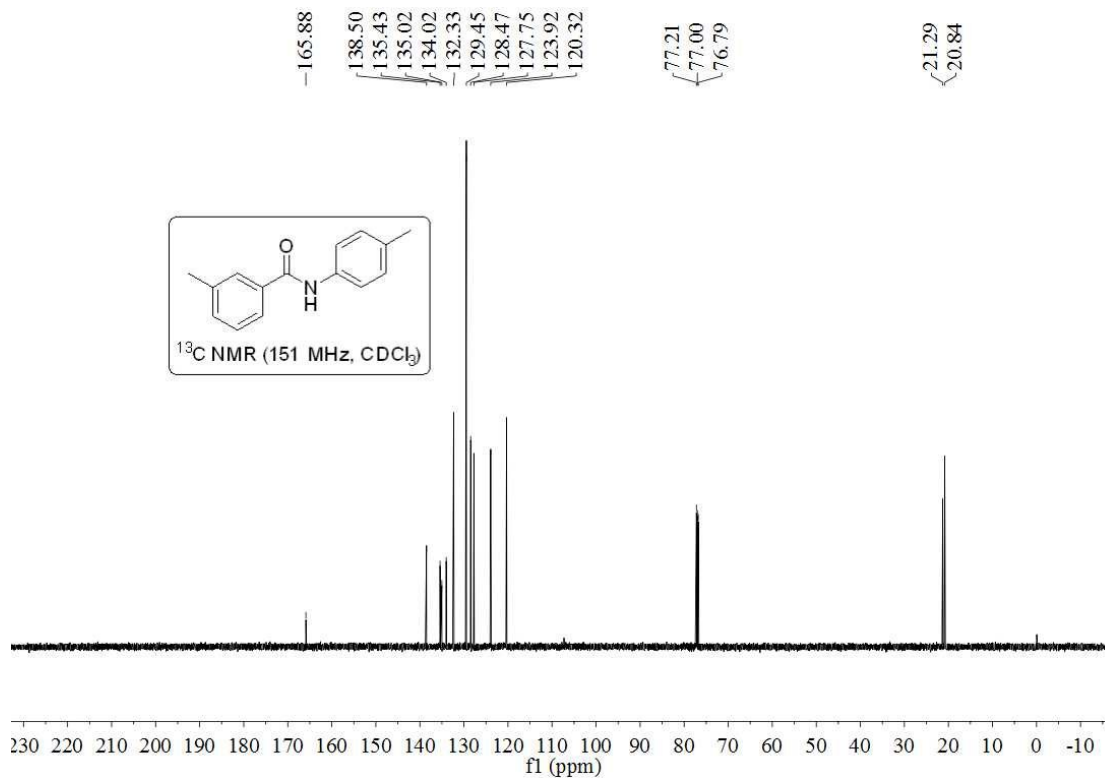

## 2-methyl-N-(p-tolyl)benzamide (3d)

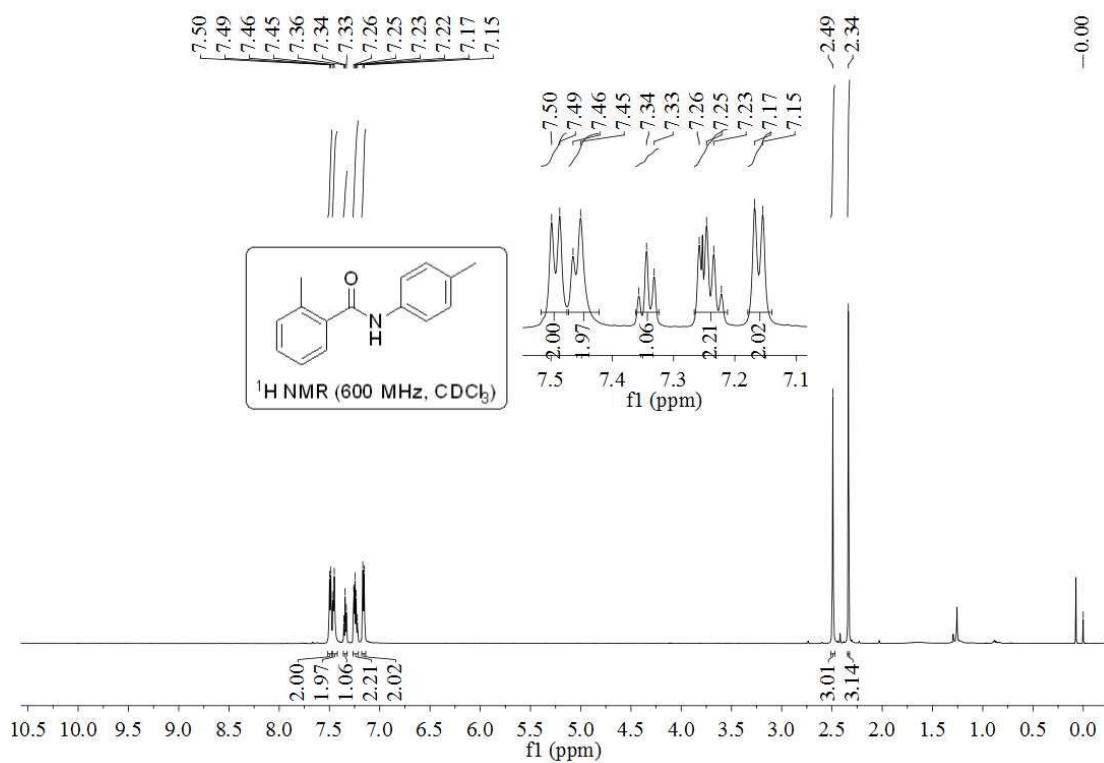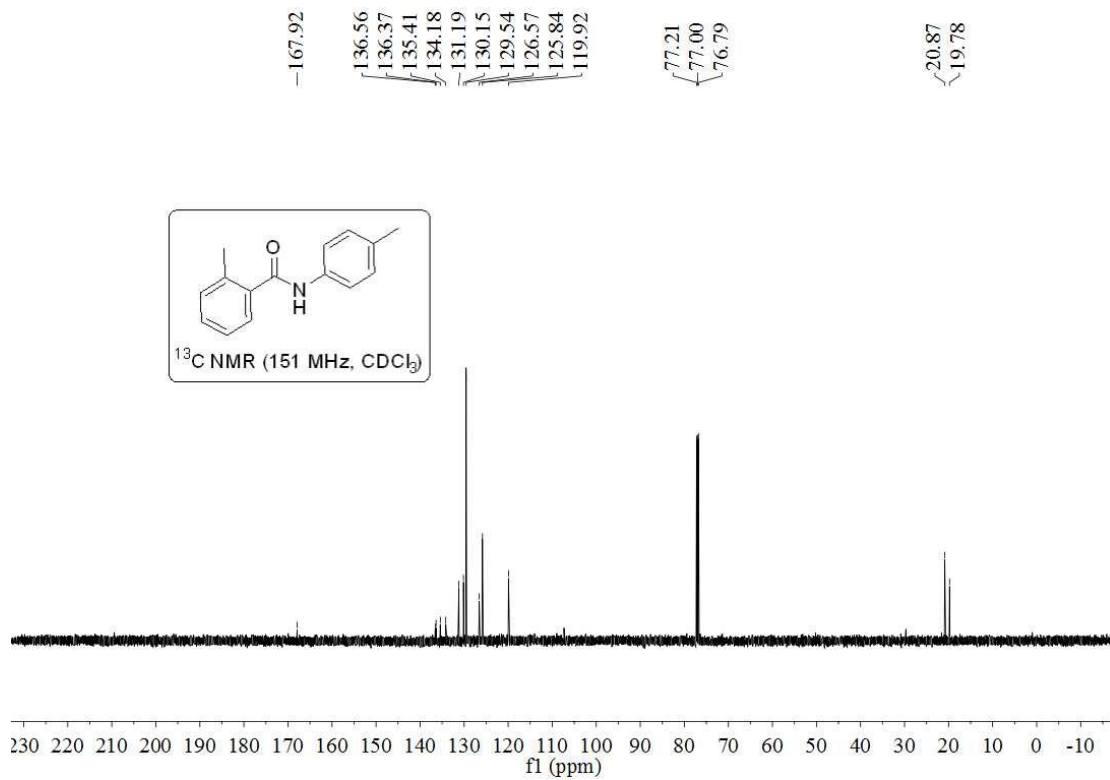



### 4-fluoro-N-(p-tolyl)benzamide (3e)

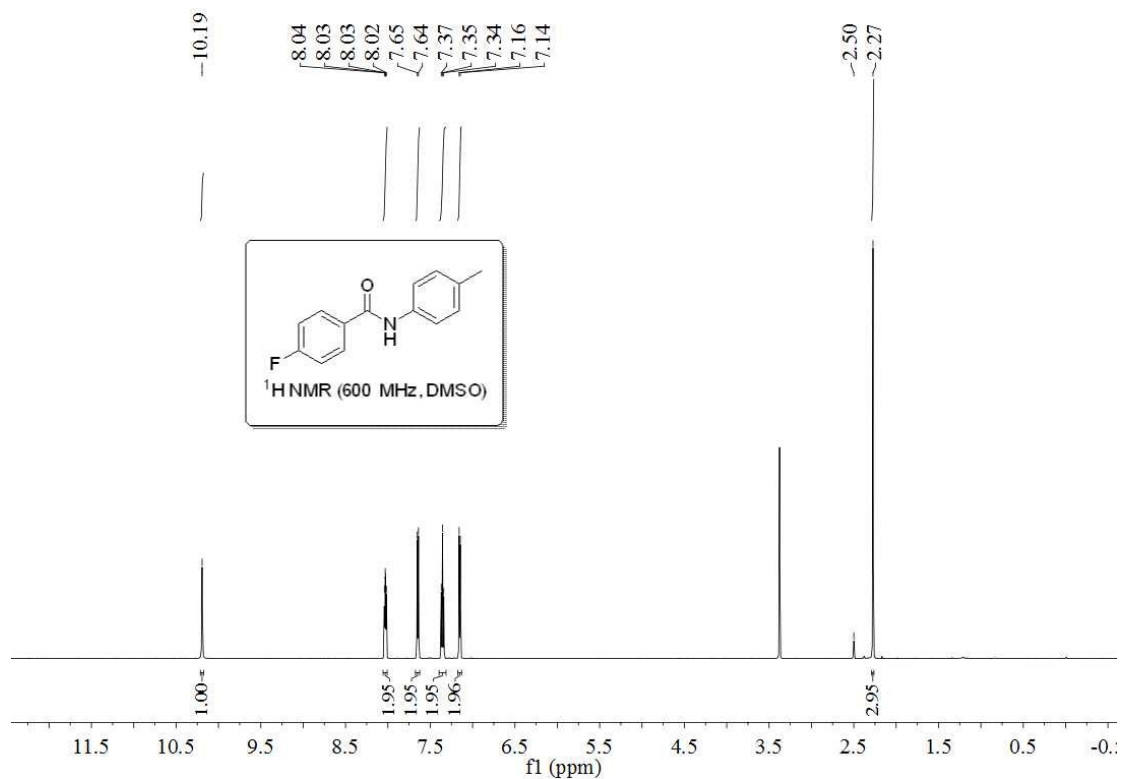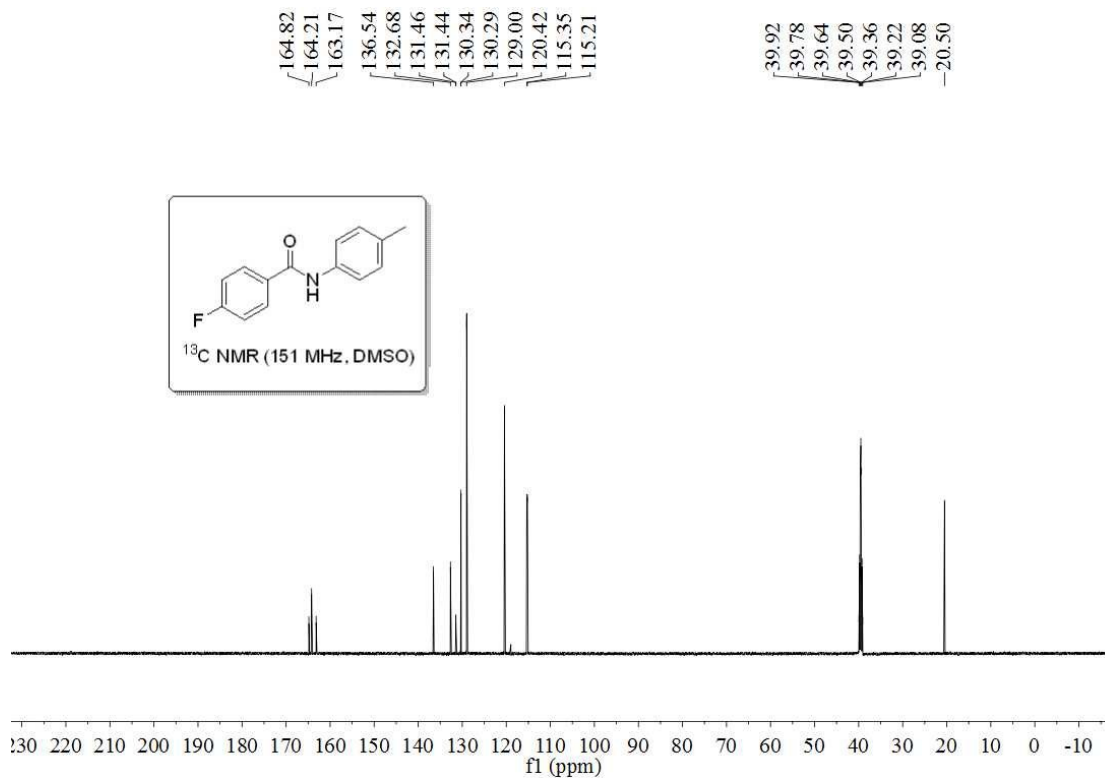

### 4-chloro-N-(p-tolyl)benzamide (3f)

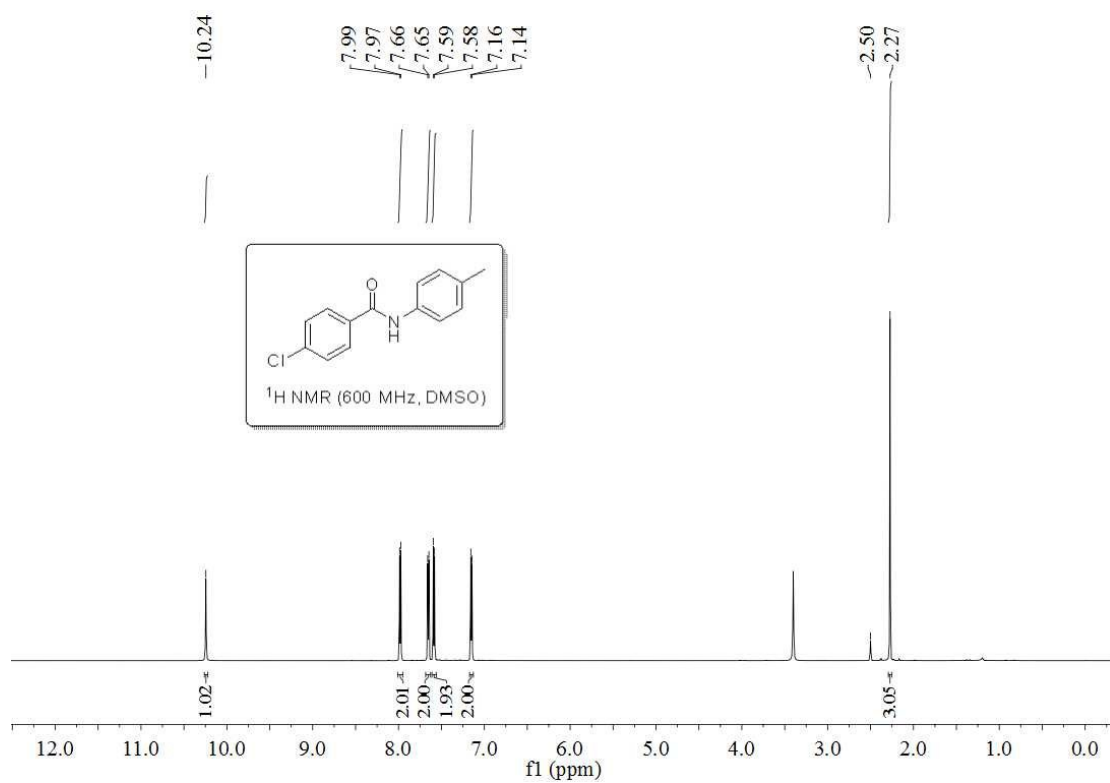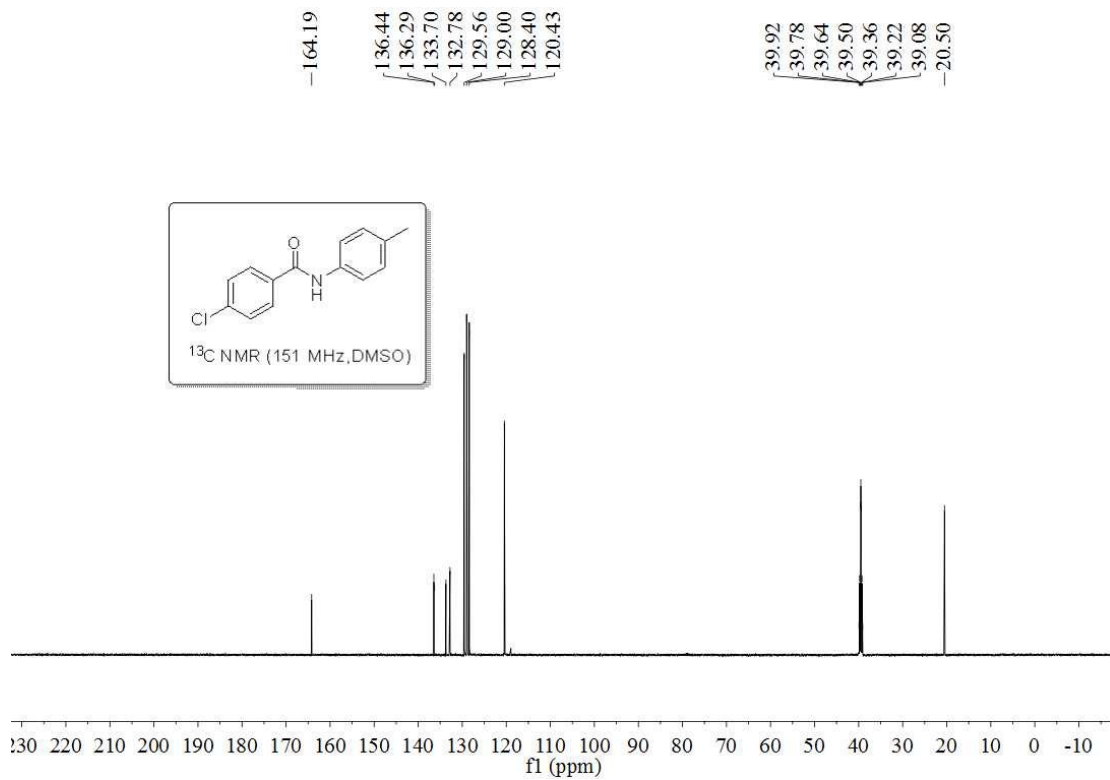

# N-(p-tolyl)-1-naphthamide (3g)

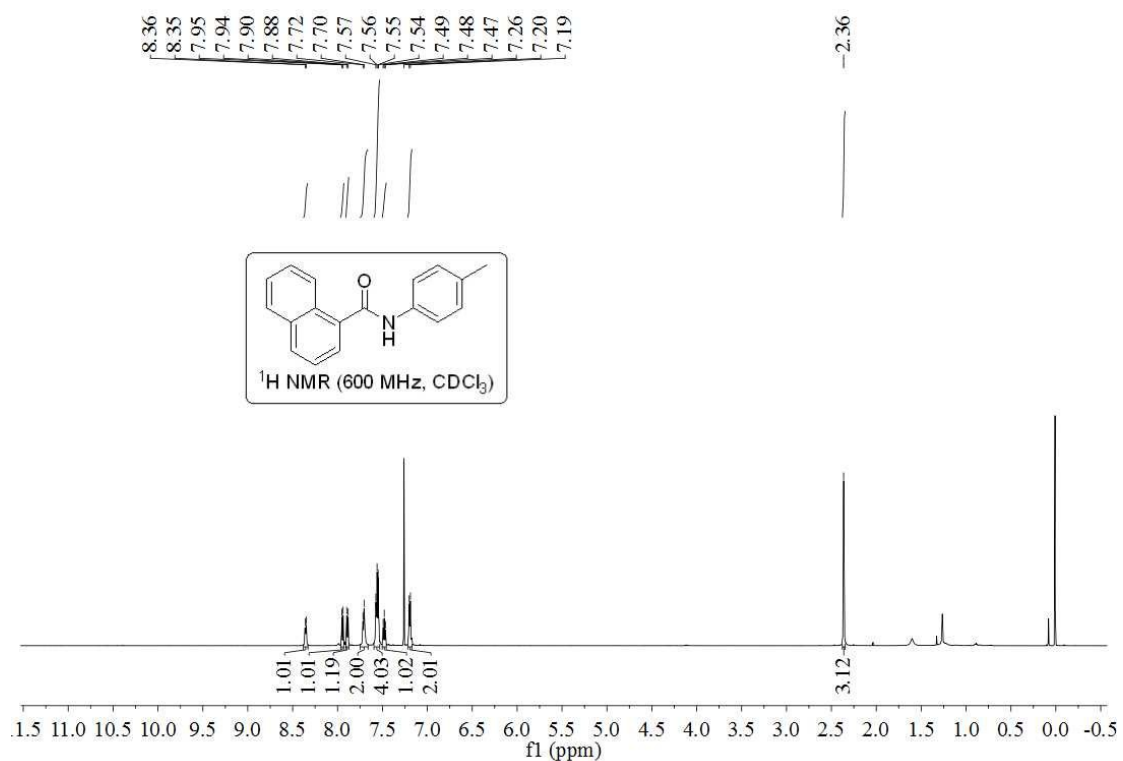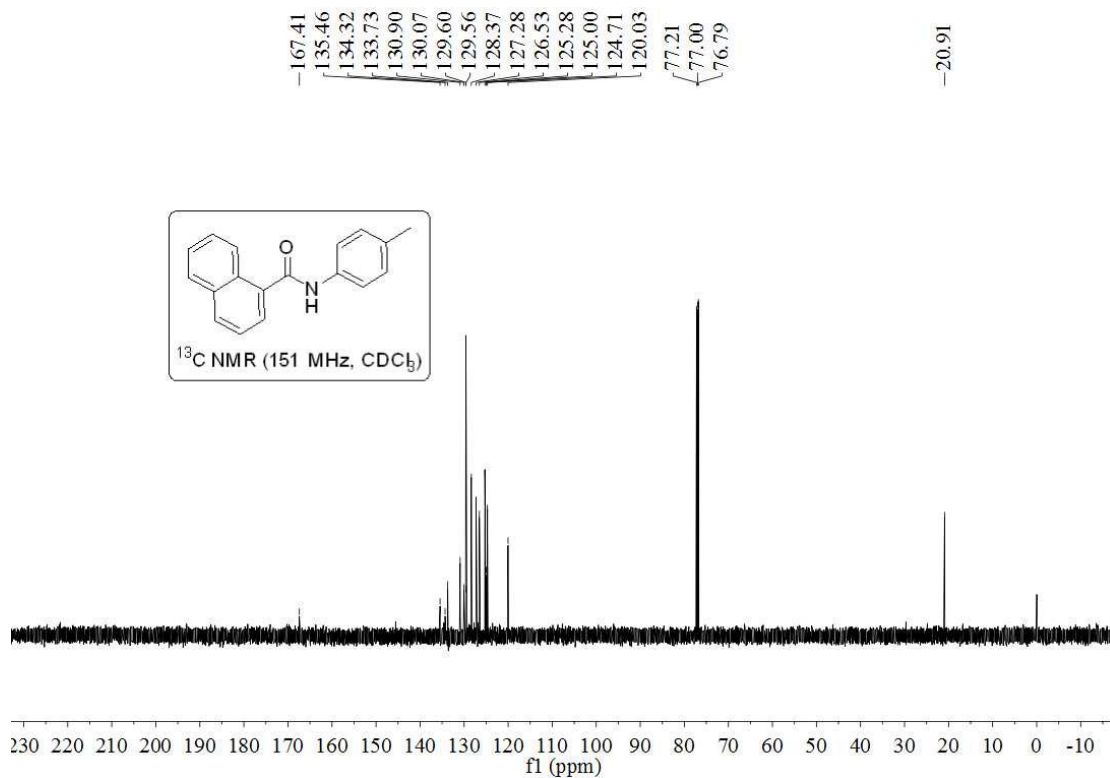

## N-(p-tolyl)-2-naphthamide (3h)

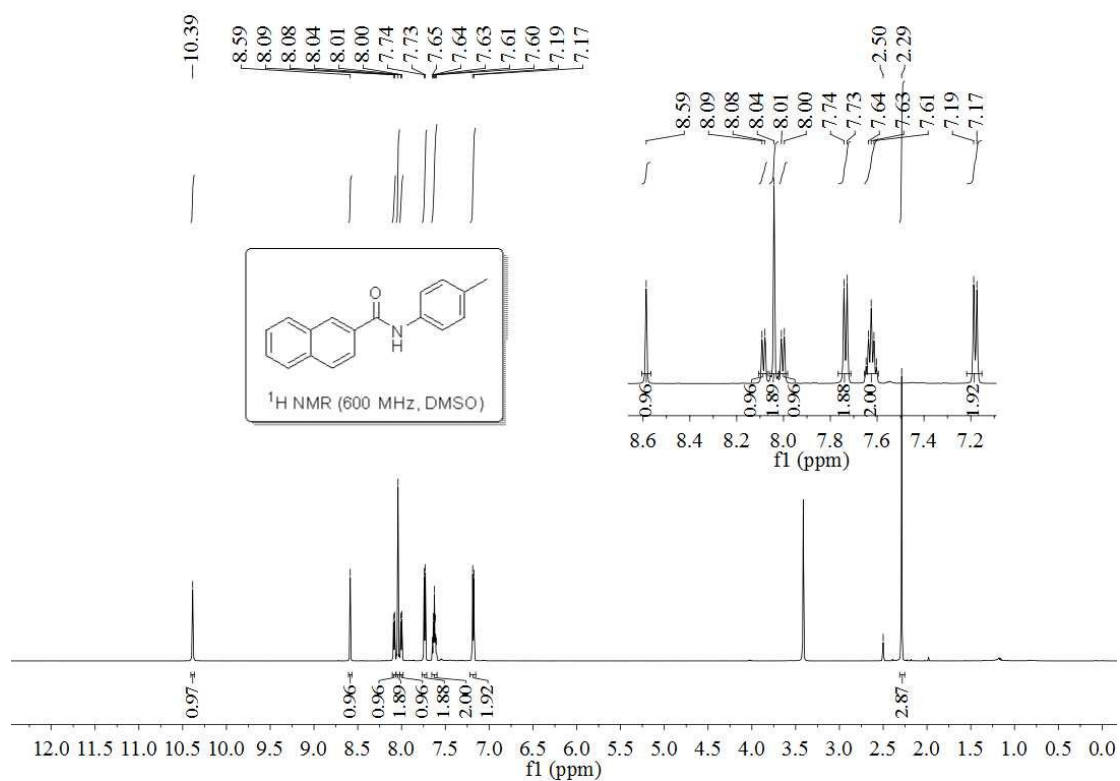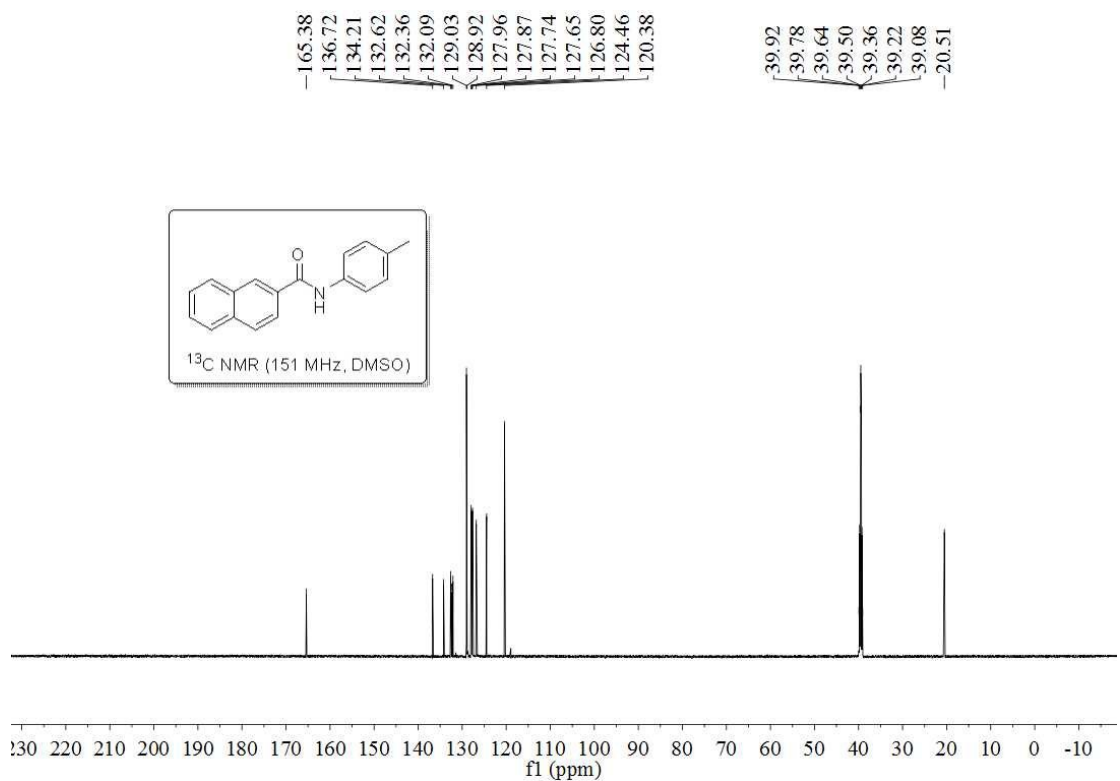

### N-(p-tolyl)thiophene-2-carboxamide (3i)

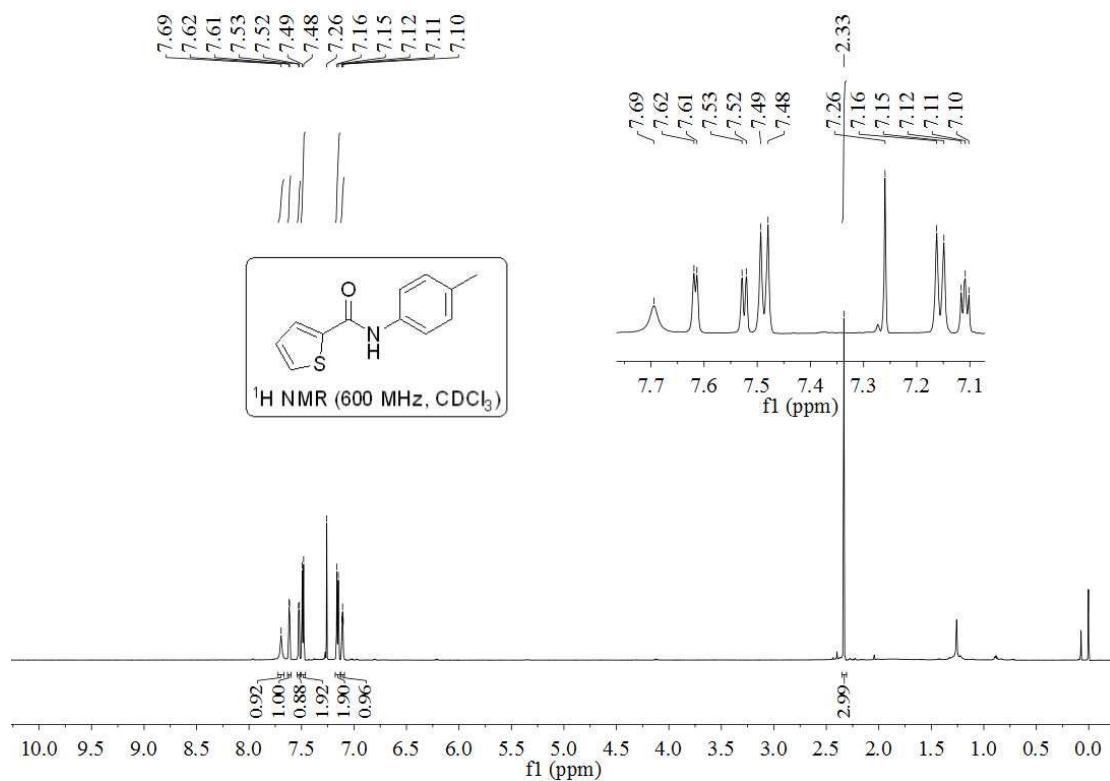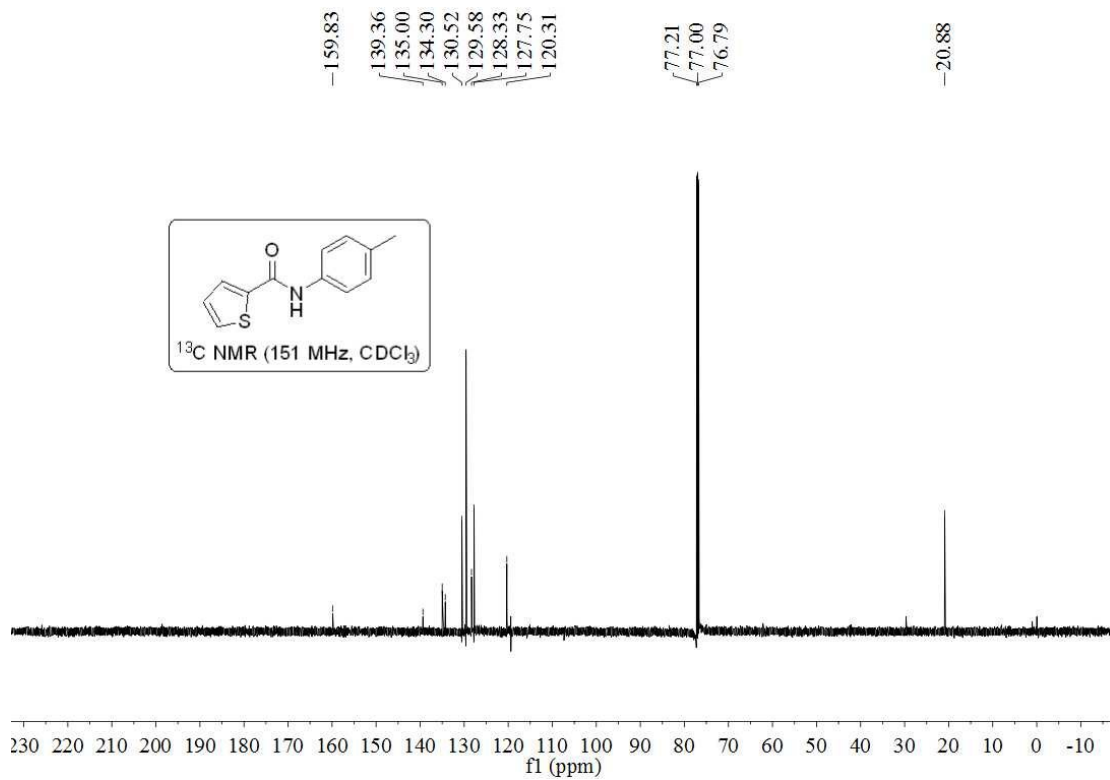

### N-(p-tolyl)acetamide (3j)

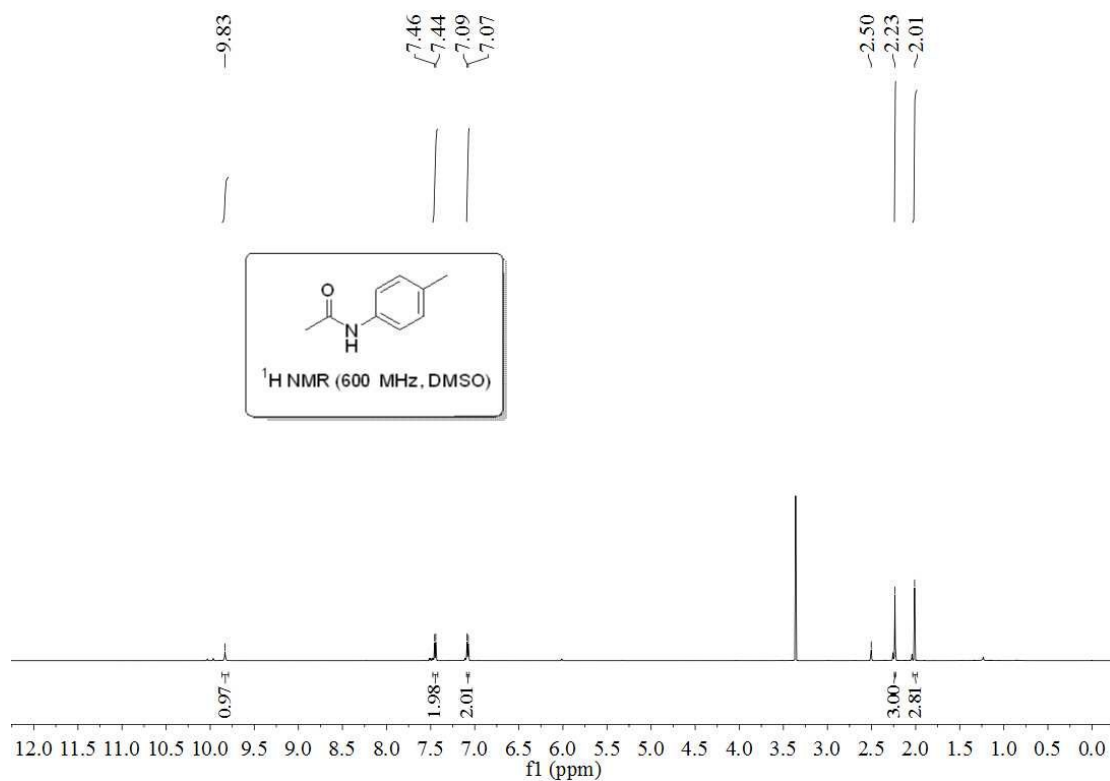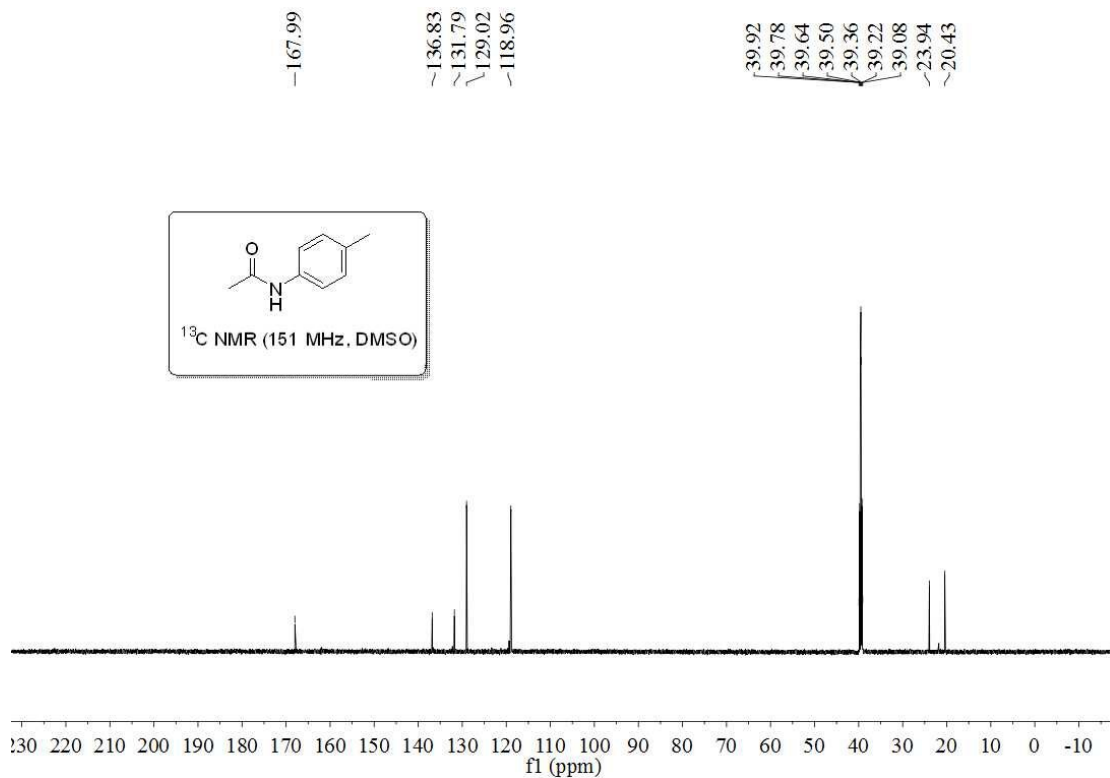

### N-(p-tolyl)pivalamide (3k)

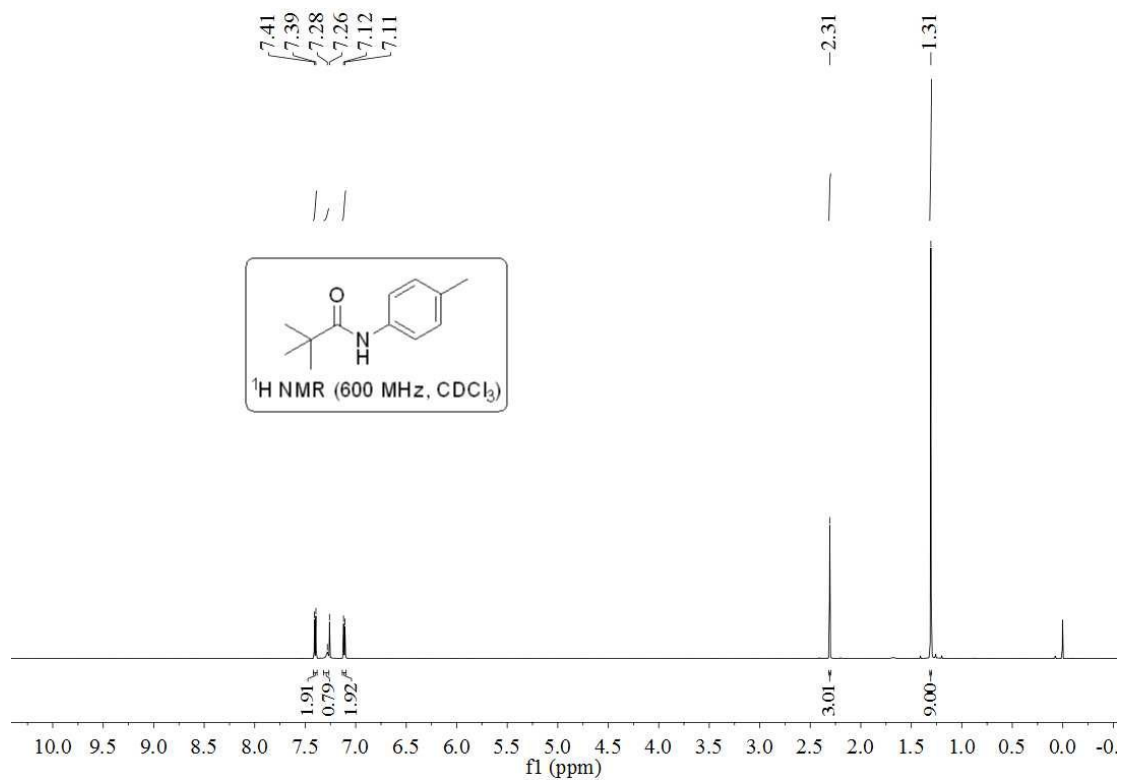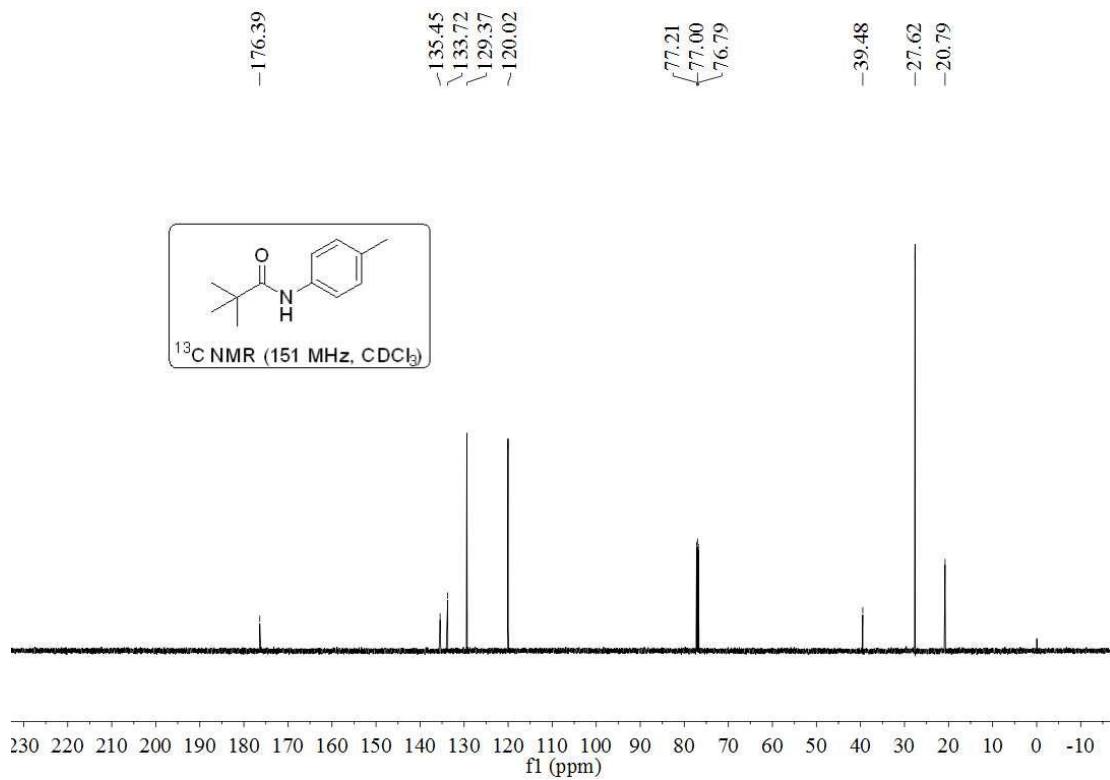

# N-phenylbenzamide (3l)

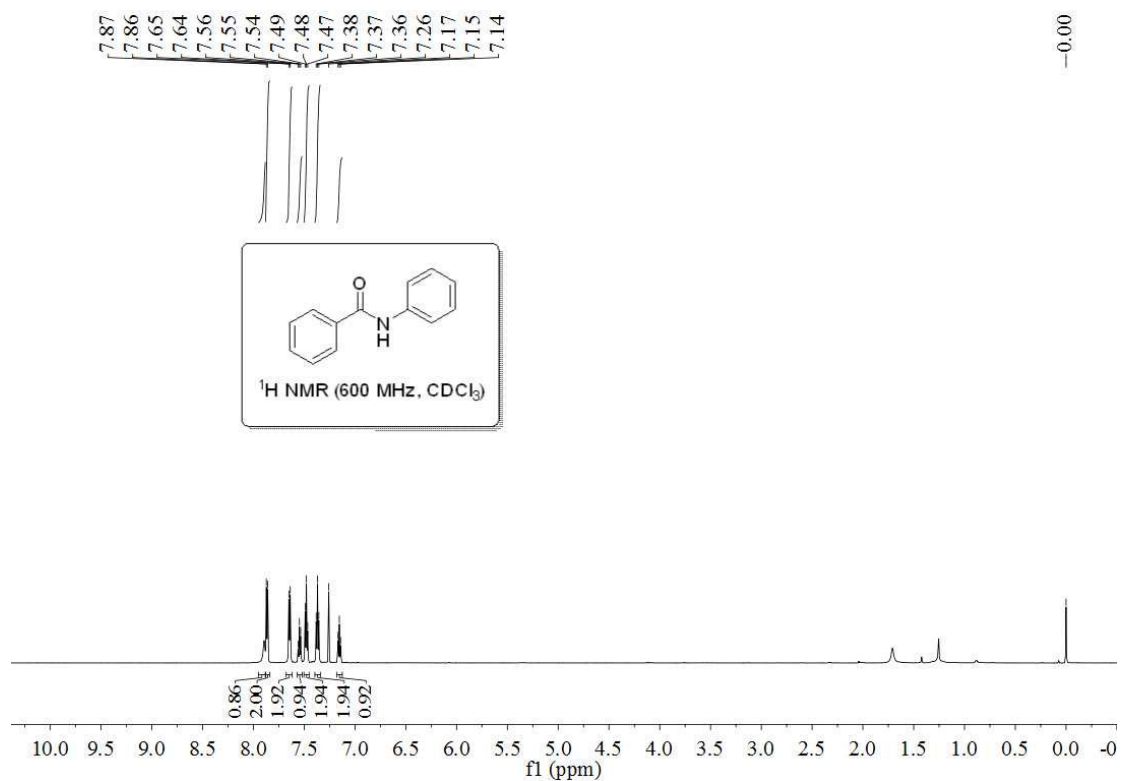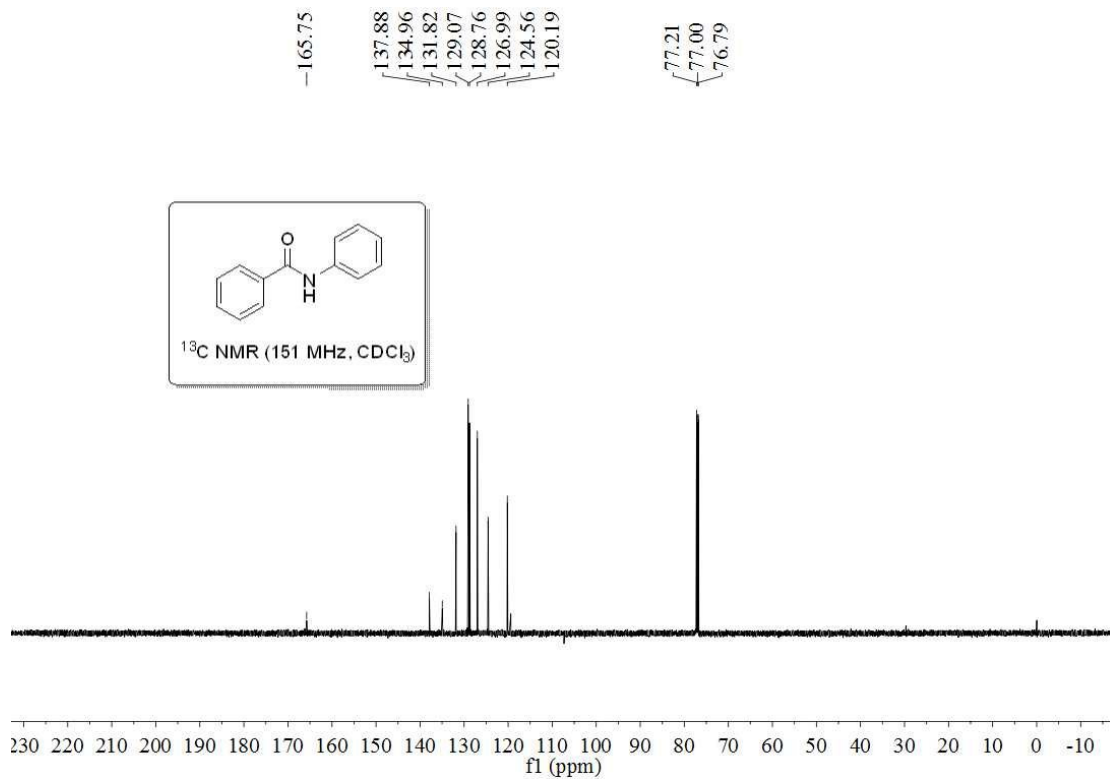



# N-(2-methoxyphenyl)benzamide (3m)

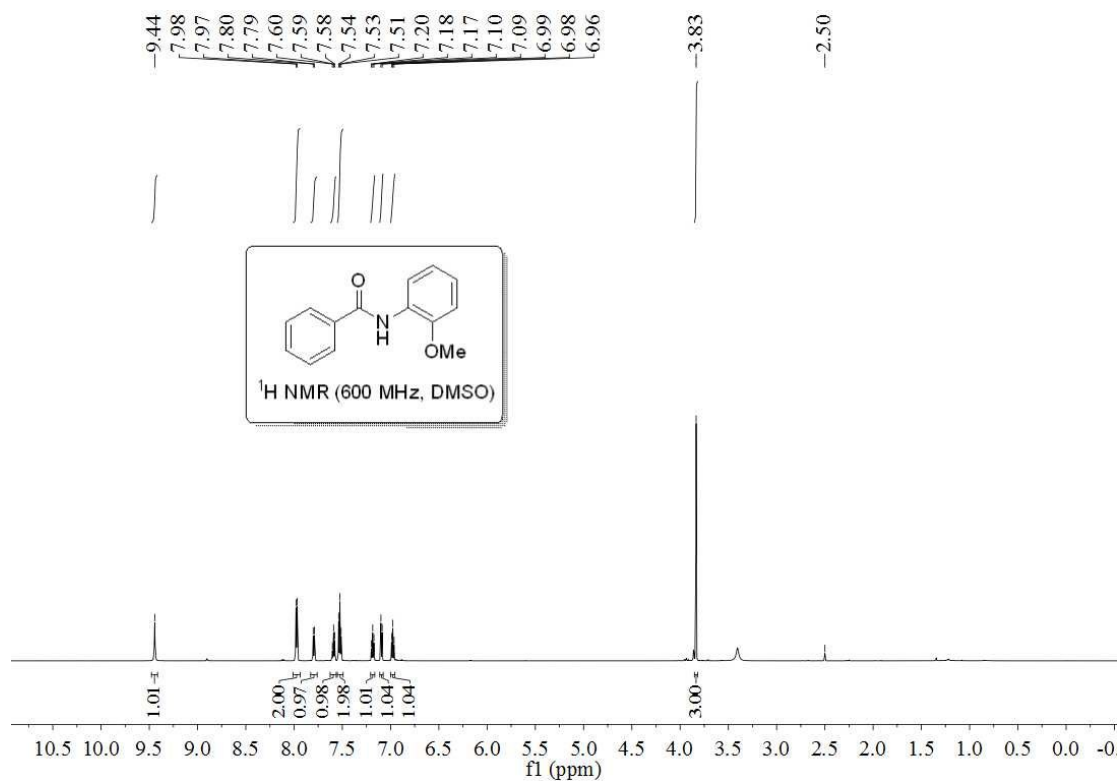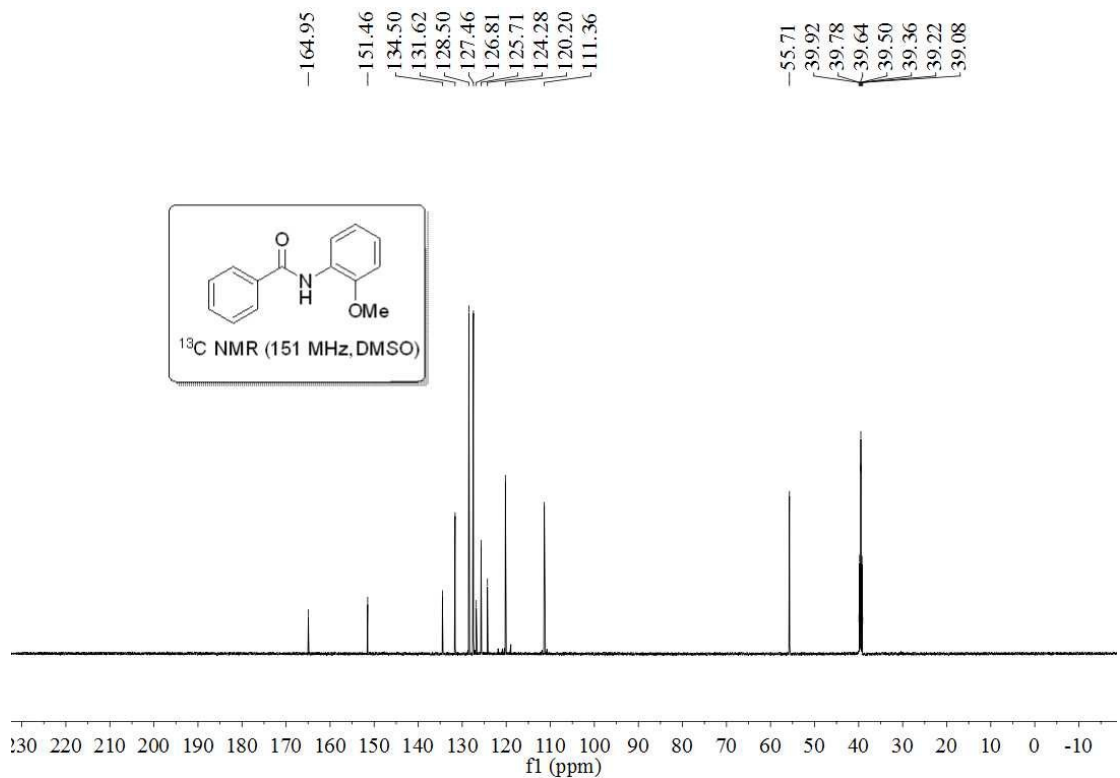

### N-(m-tolyl)benzamide (3n)

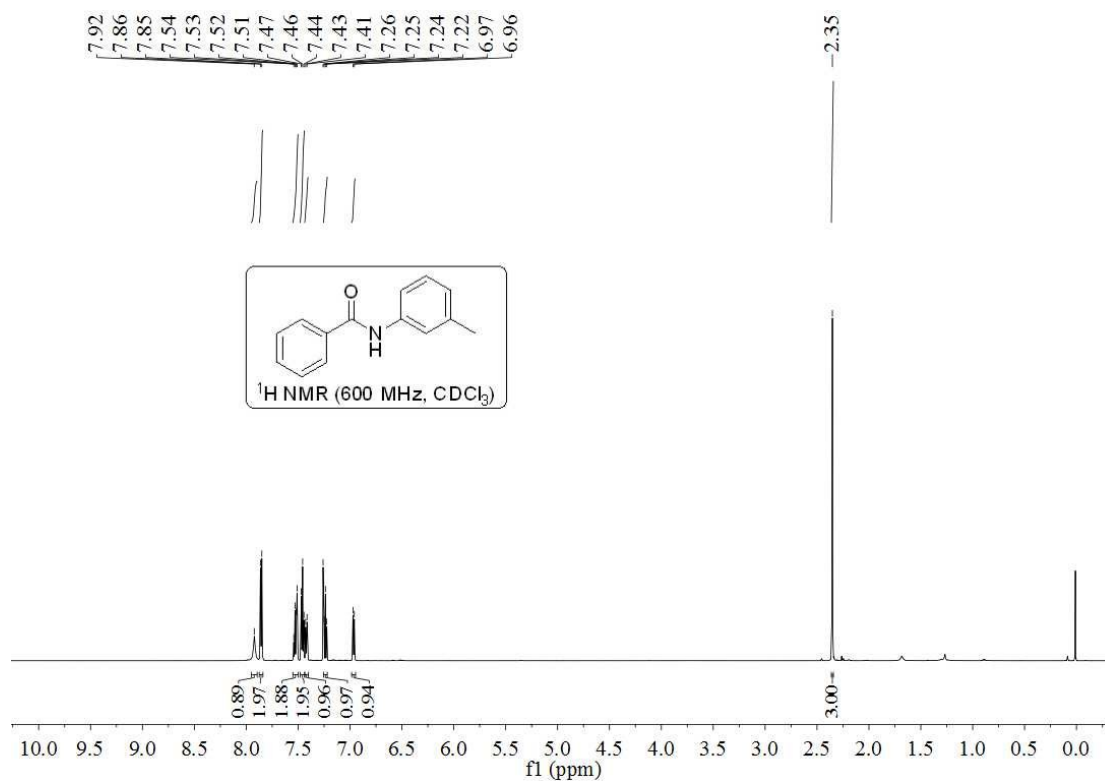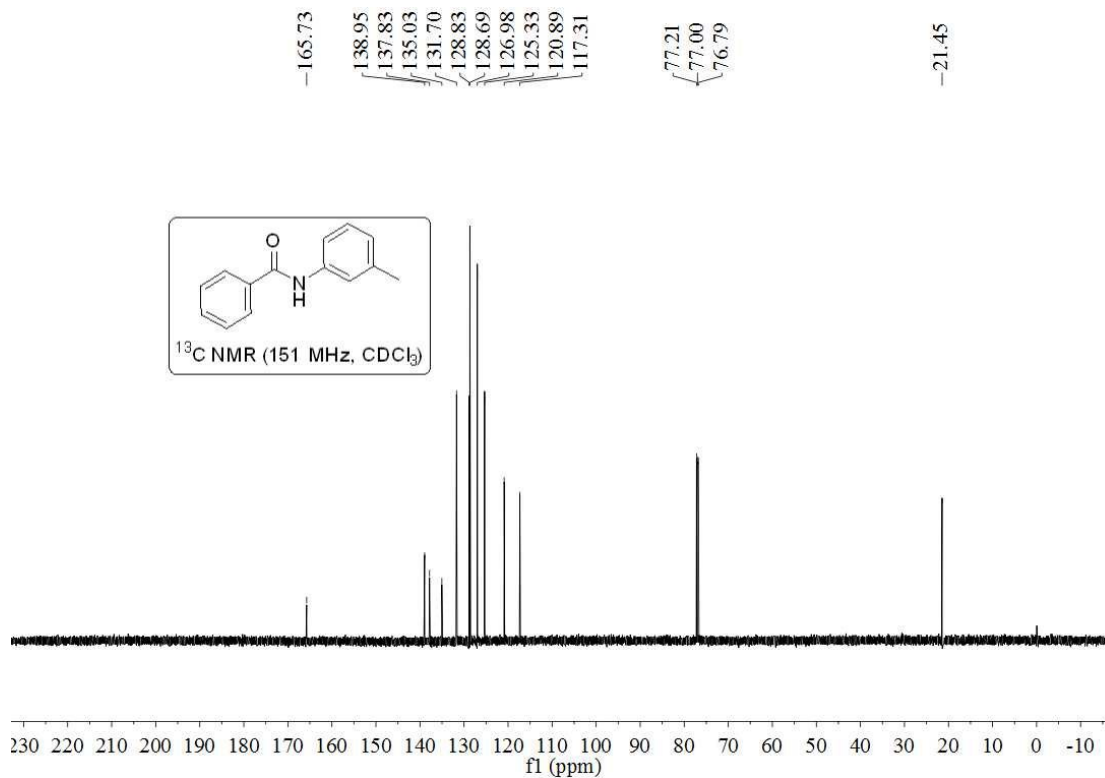

# N-(4-isopropylphenyl)benzamide (3o)

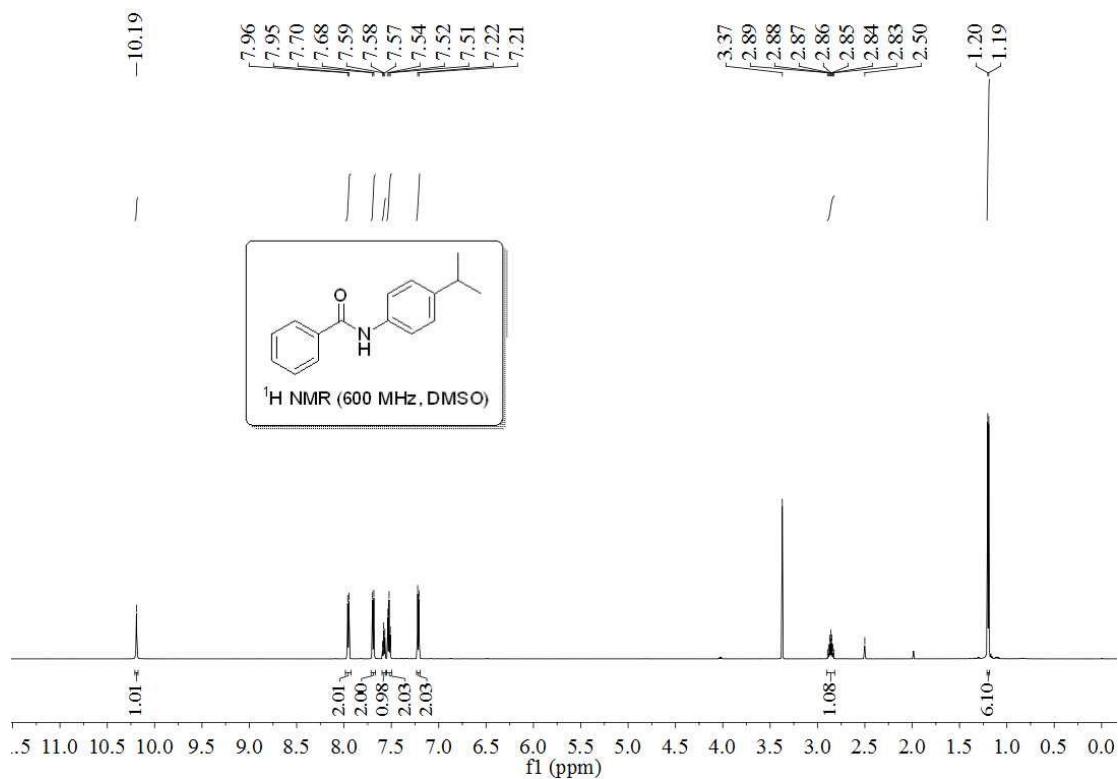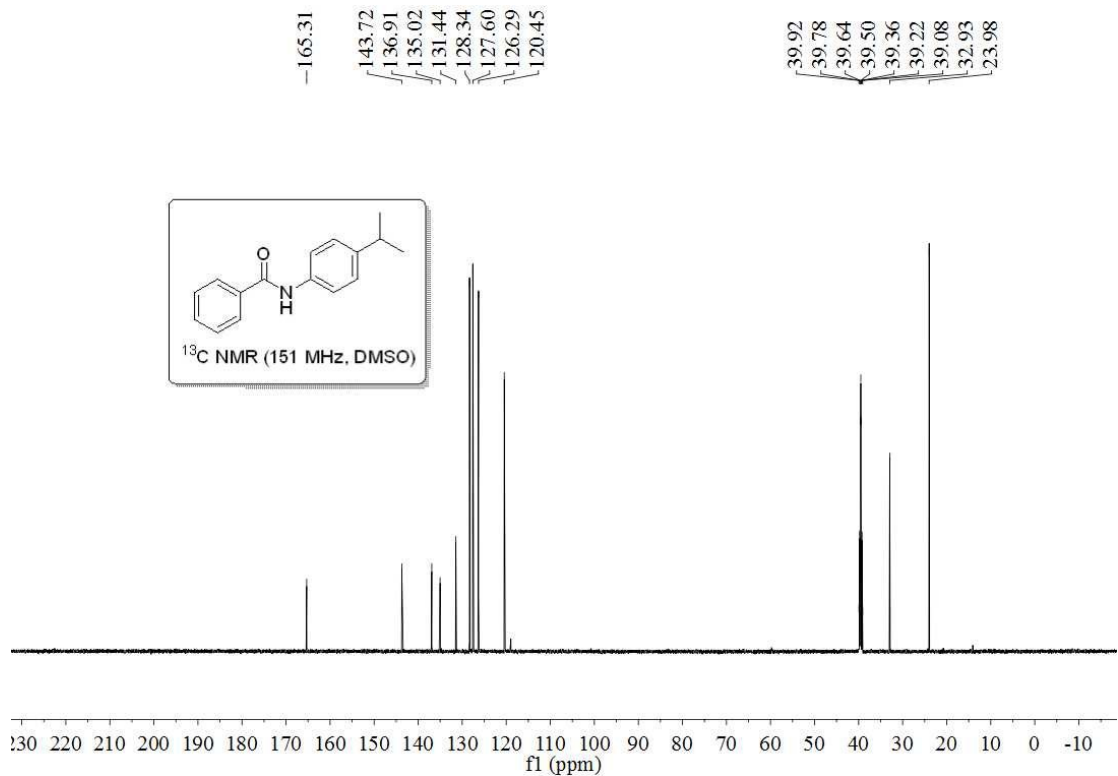

# N-(4-(tert-butyl)phenyl)benzamide (3p)

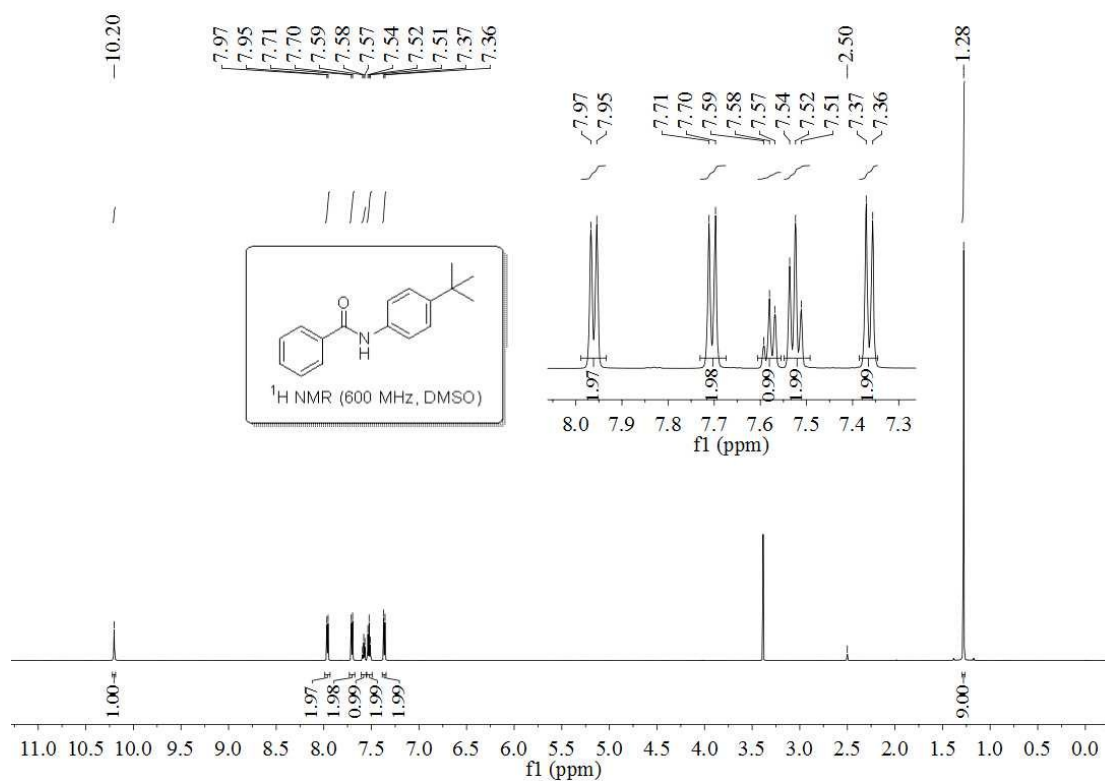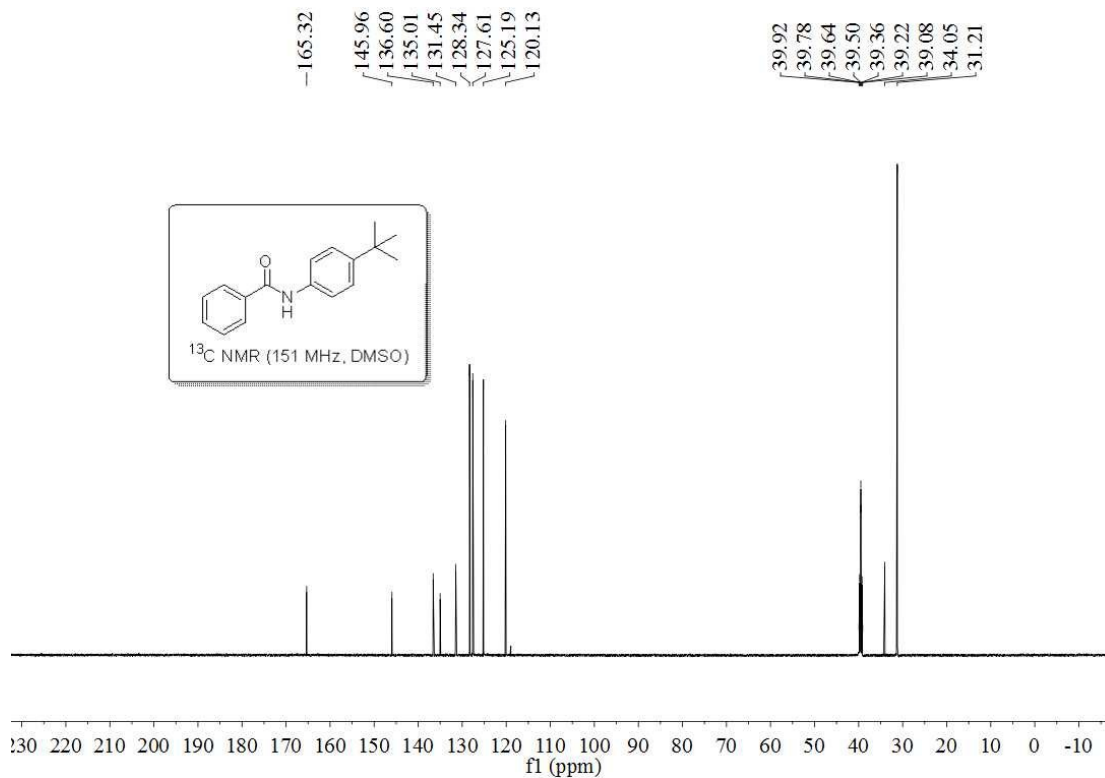

# N-(4-chlorophenyl)benzamide (3q)

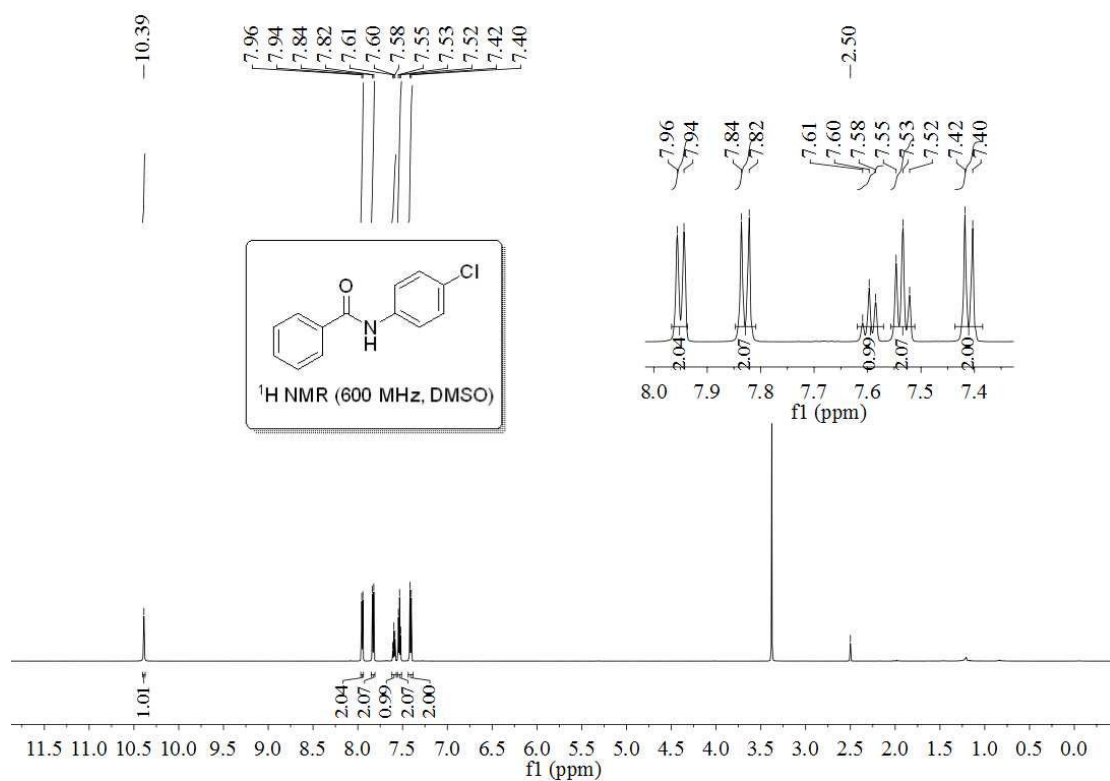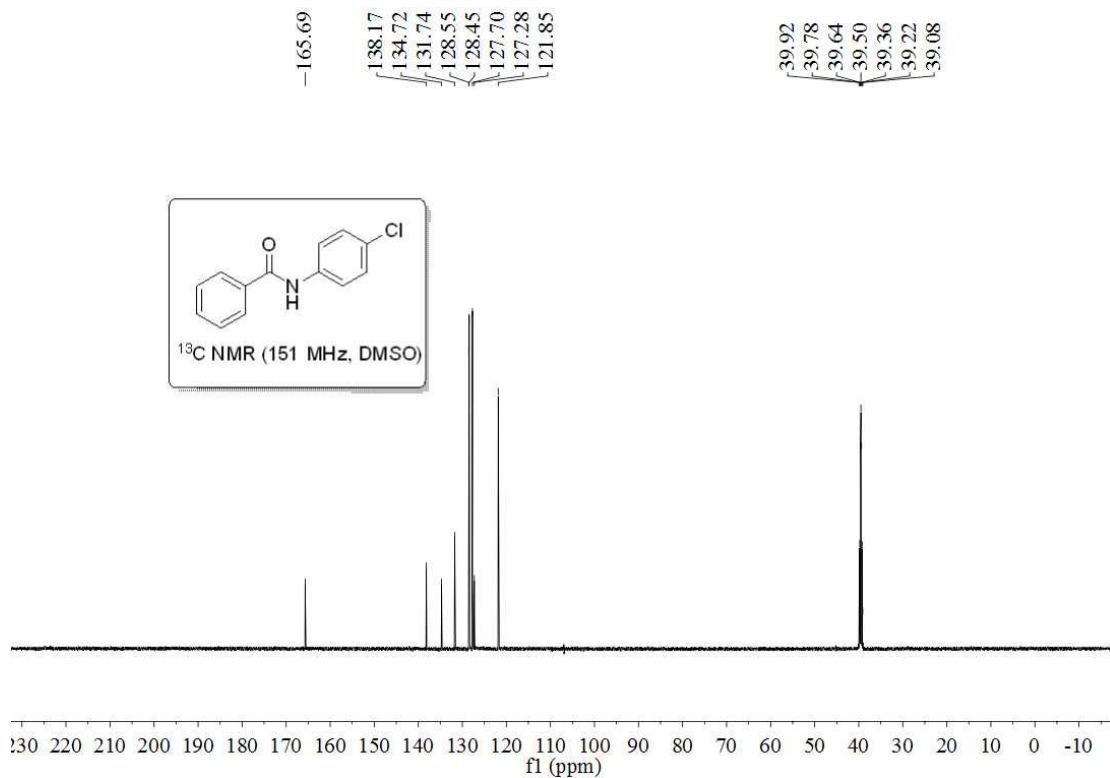

# N-(4-iodophenyl)benzamide (3r)

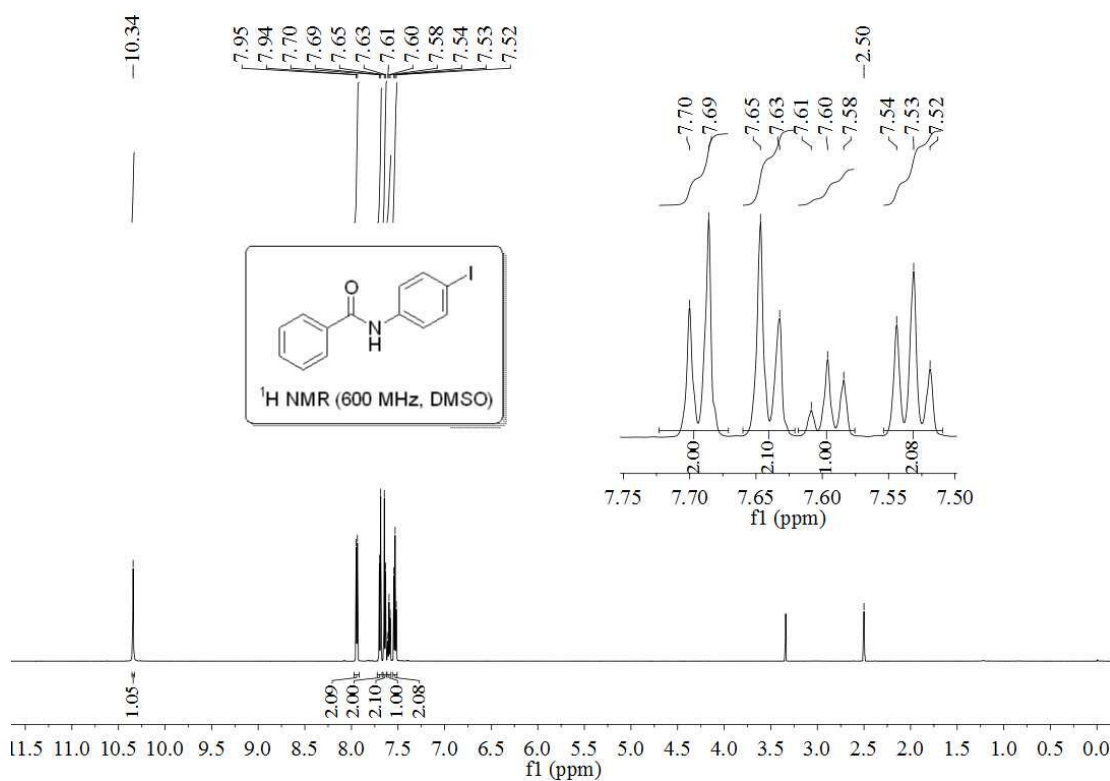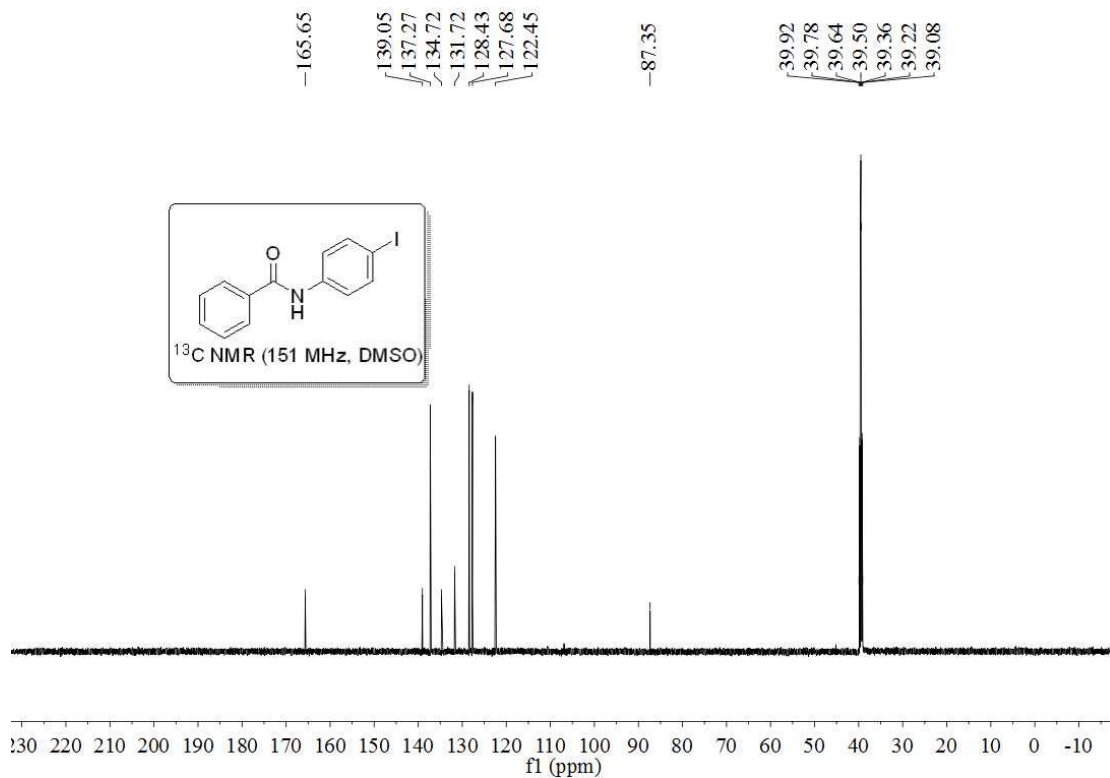

# N-(4-(2-hydroxyethyl)phenyl)benzamide (3s)

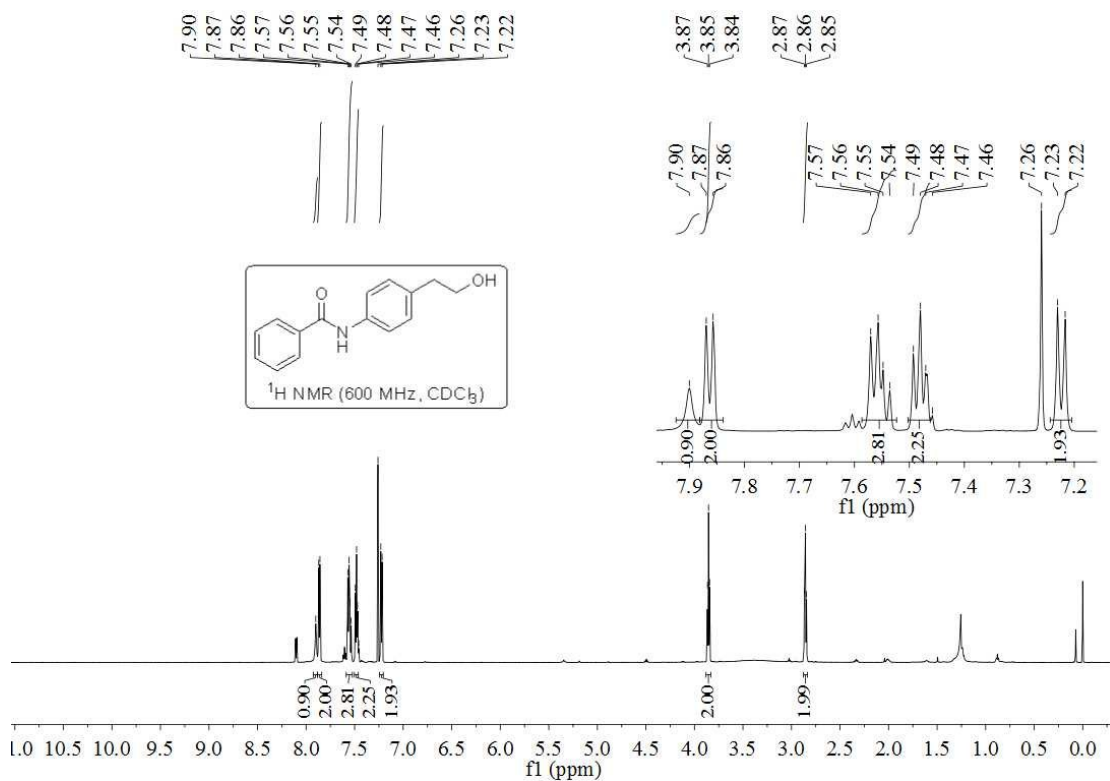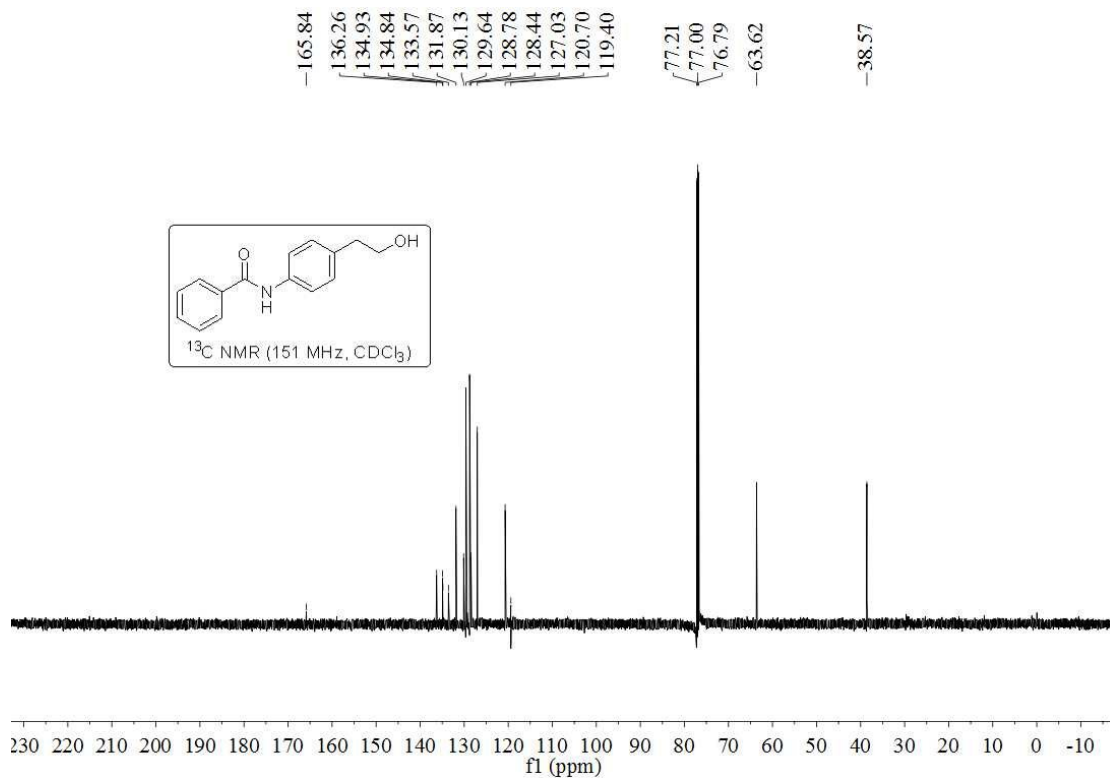

**ethyl 2-(4-benzamidophenyl)acetate (3t)**

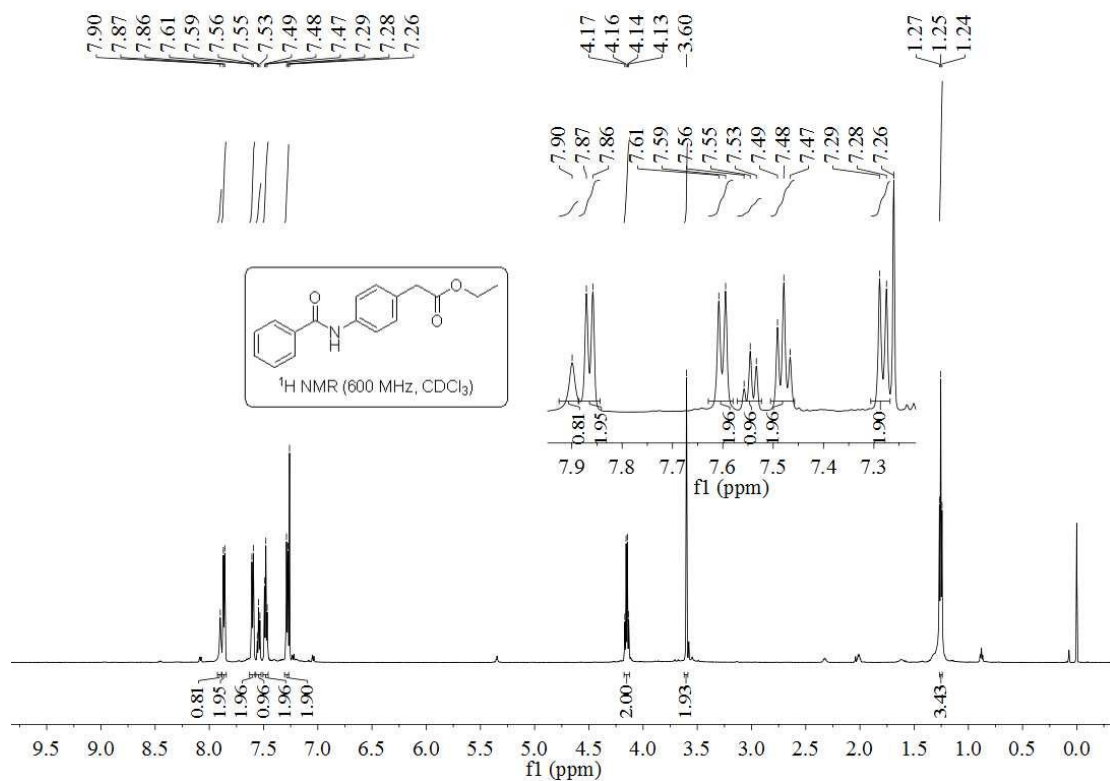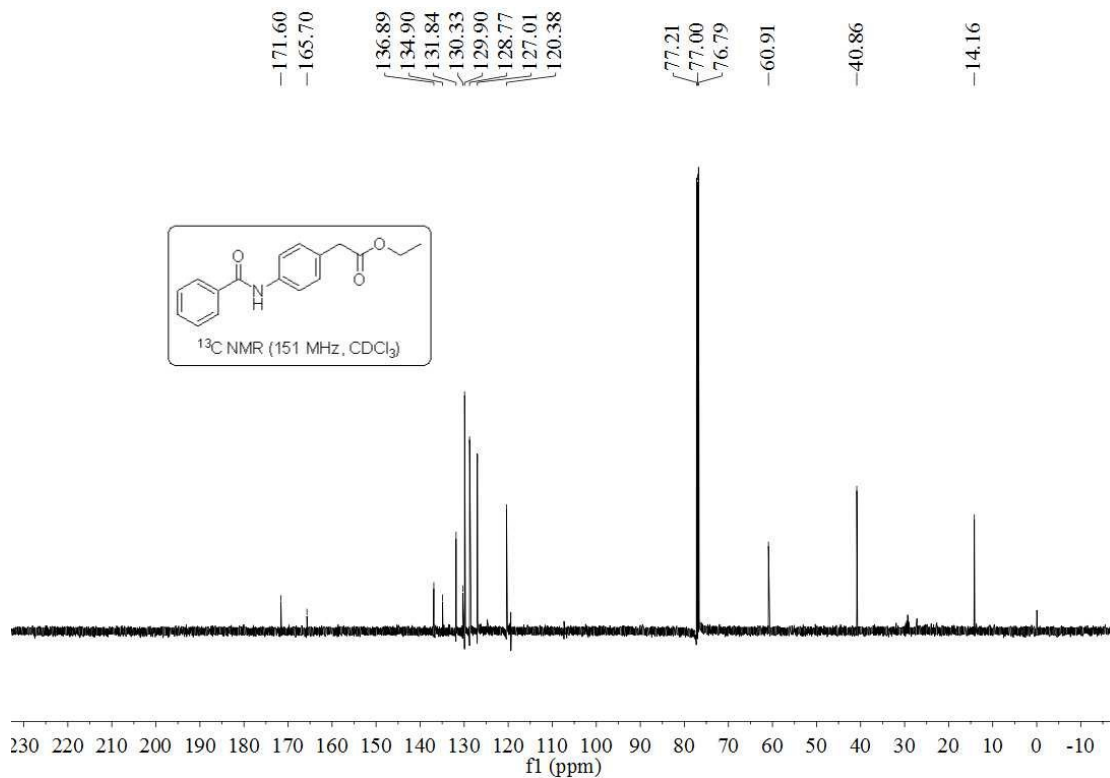



## 2-phenyl-1H-benzo[d]imidazole (4a)

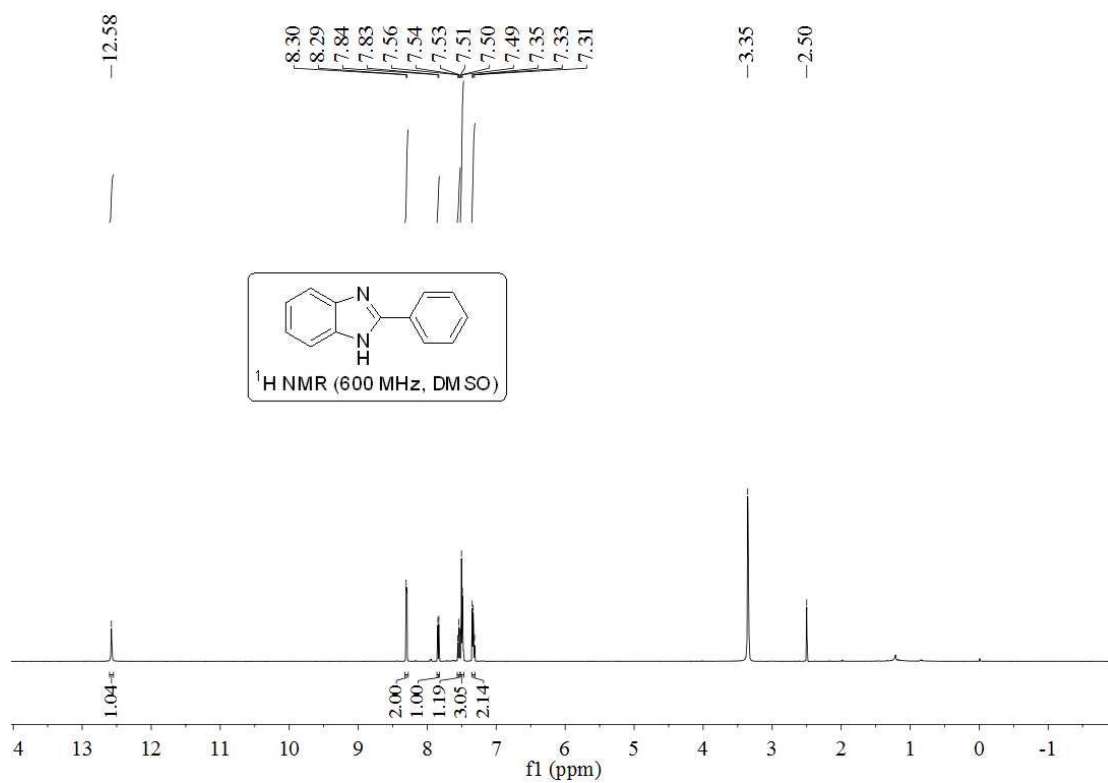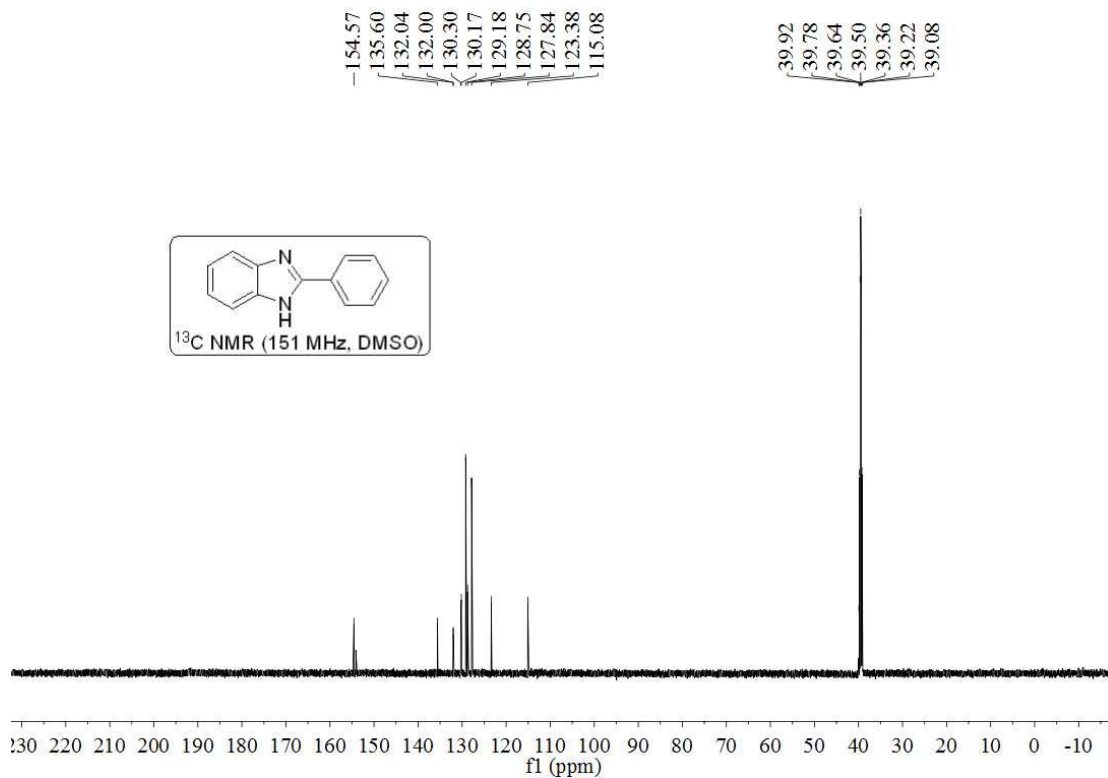

## 2-(p-tolyl)-1H-benzo[d]imidazole (4b)

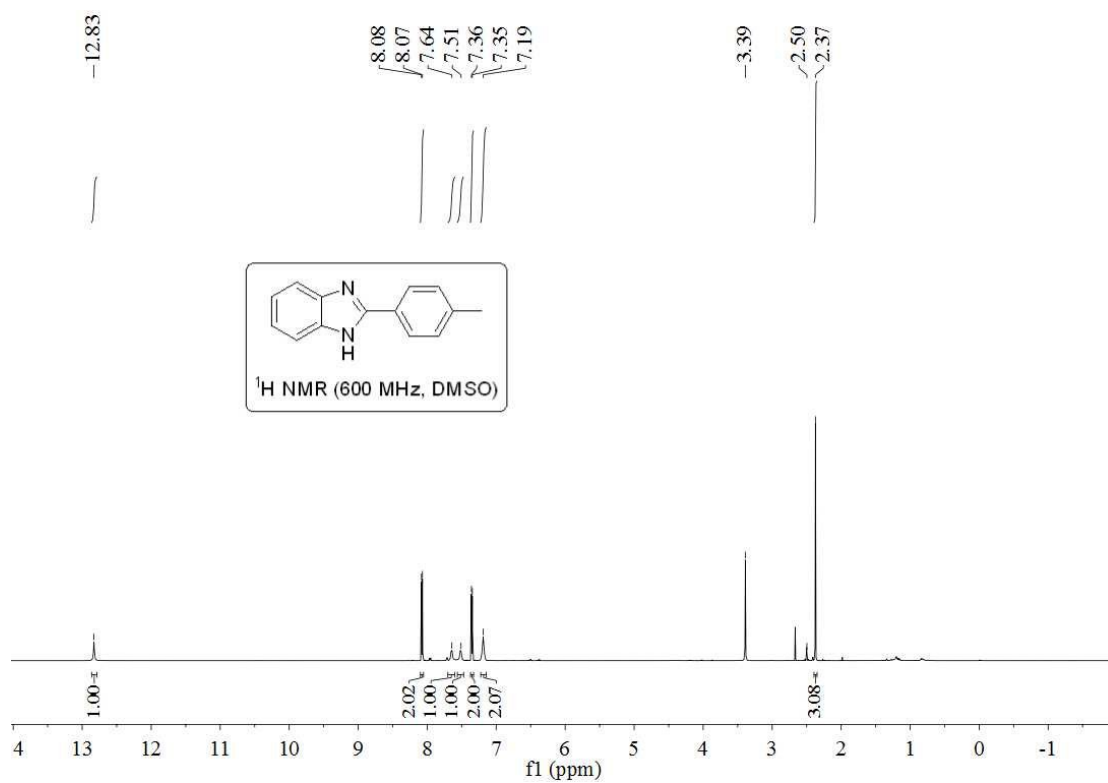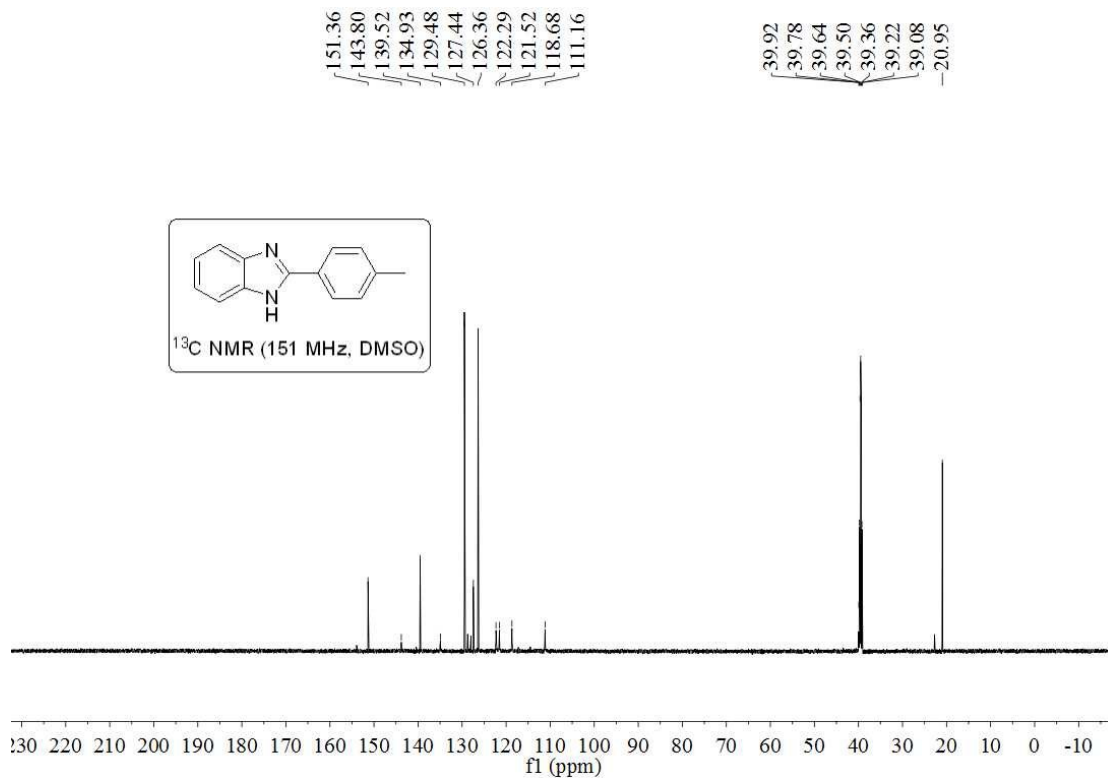

## 2-(m-tolyl)-1H-benzo[d]imidazole (4c)

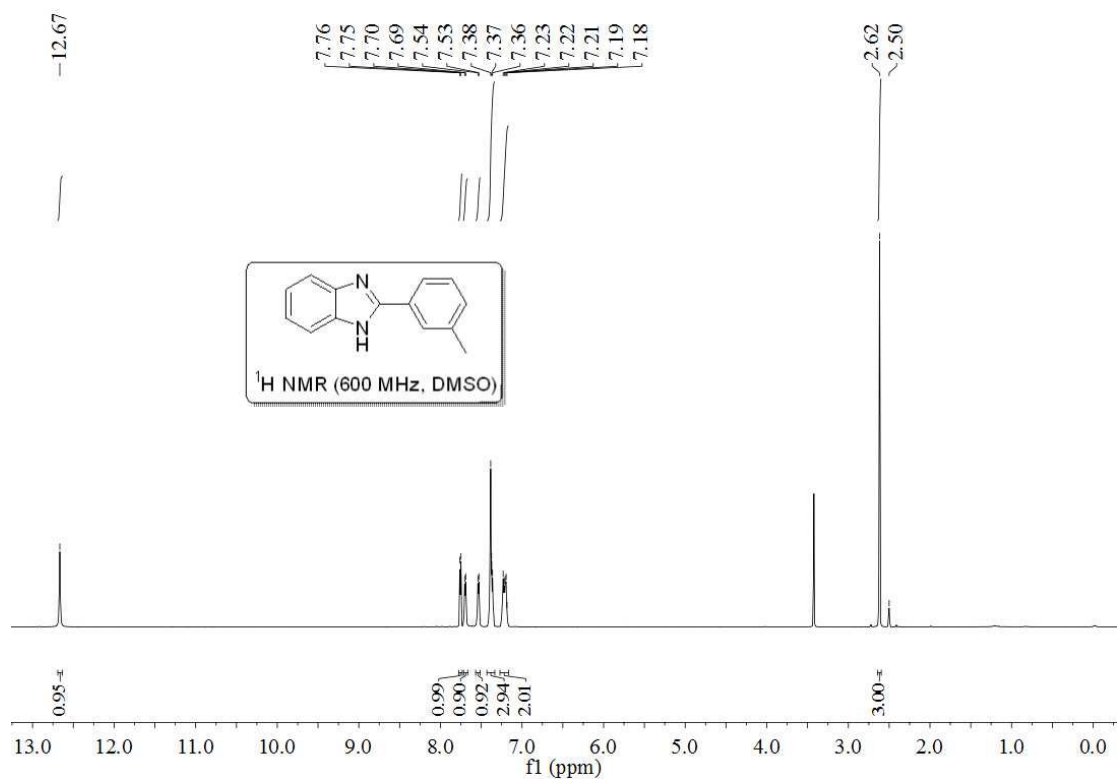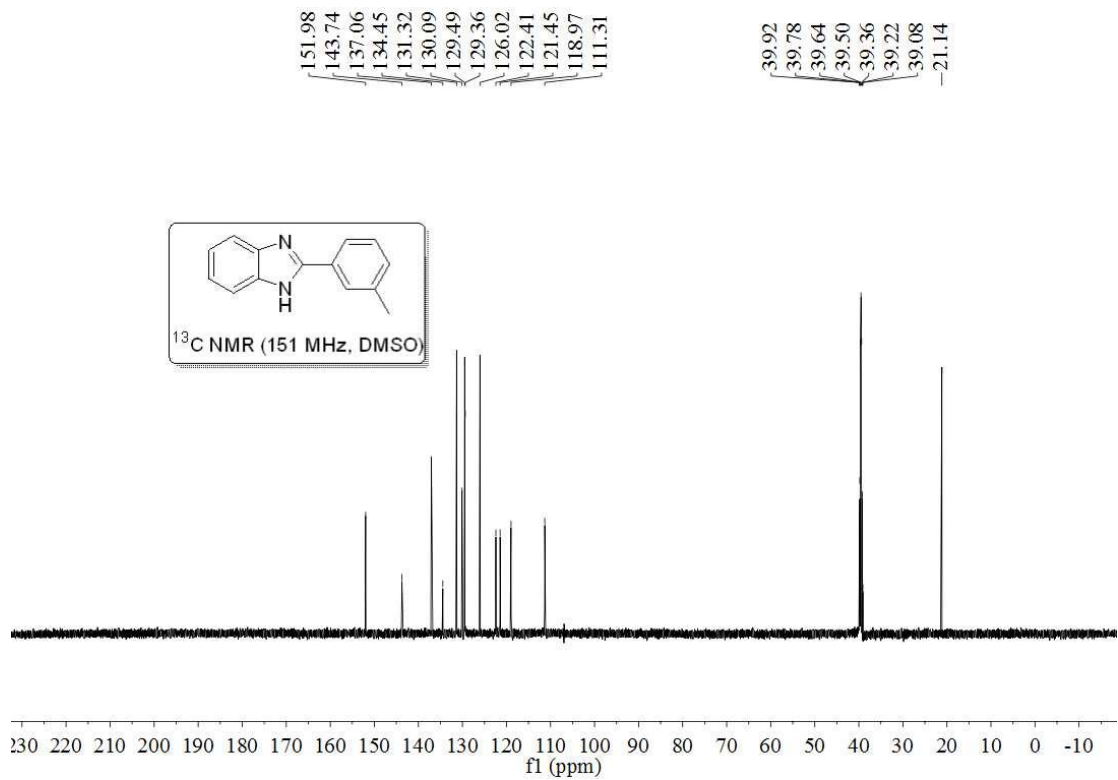

## 2-(o-tolyl)-1H-benzo[d]imidazole (4d)

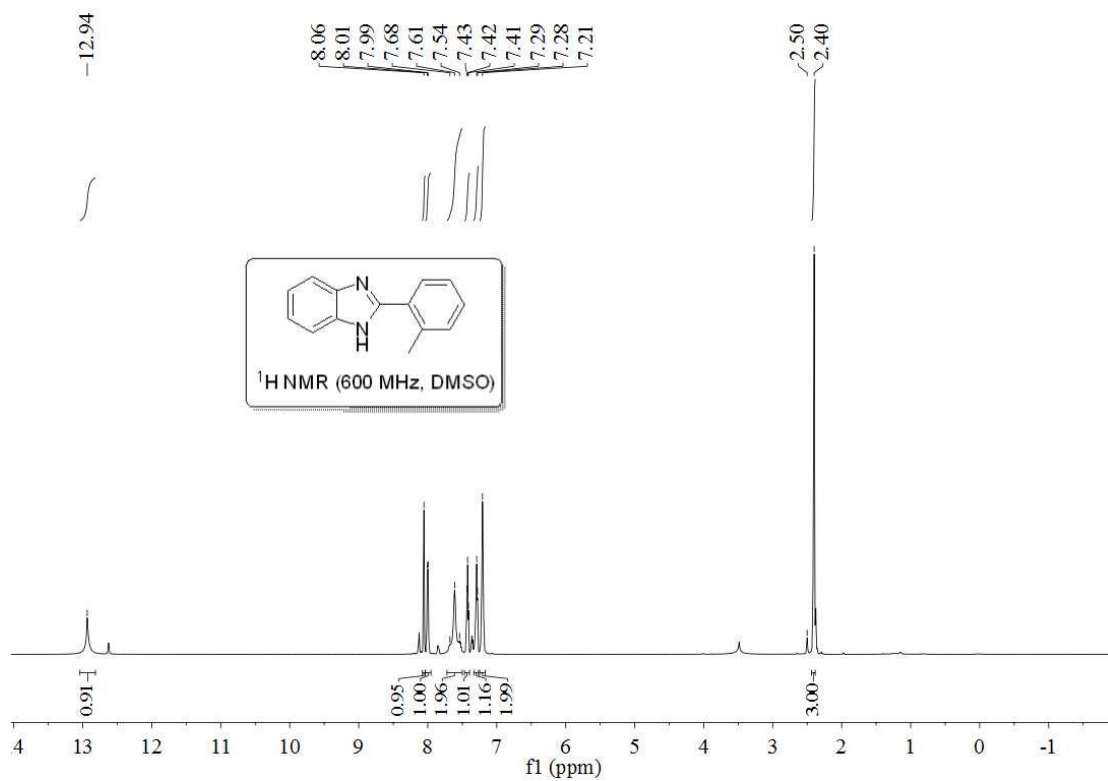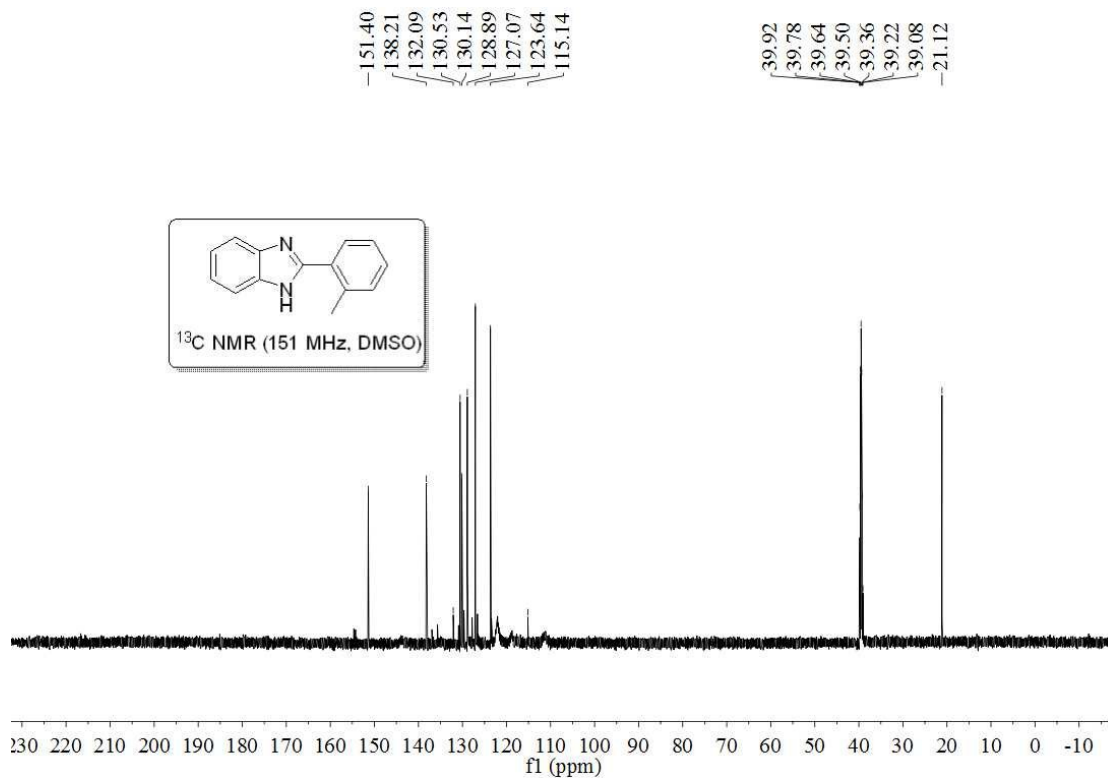

## 2-(4-chlorophenyl)-1H-benzo[d]imidazole (4e)

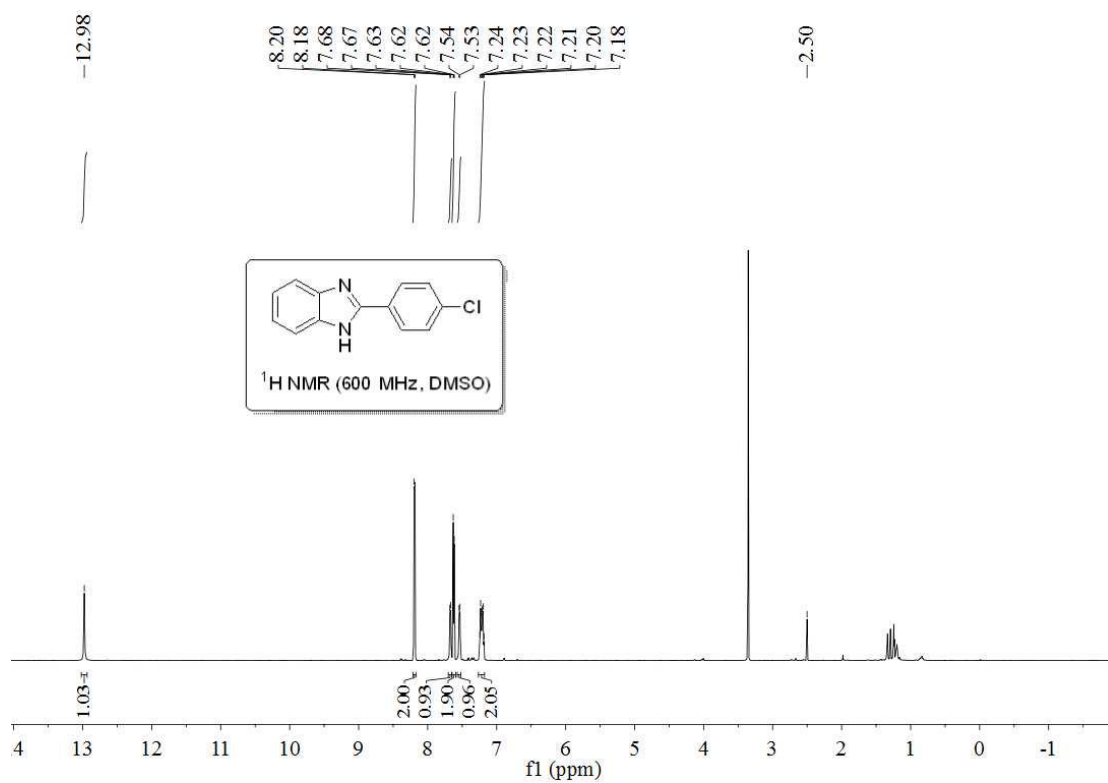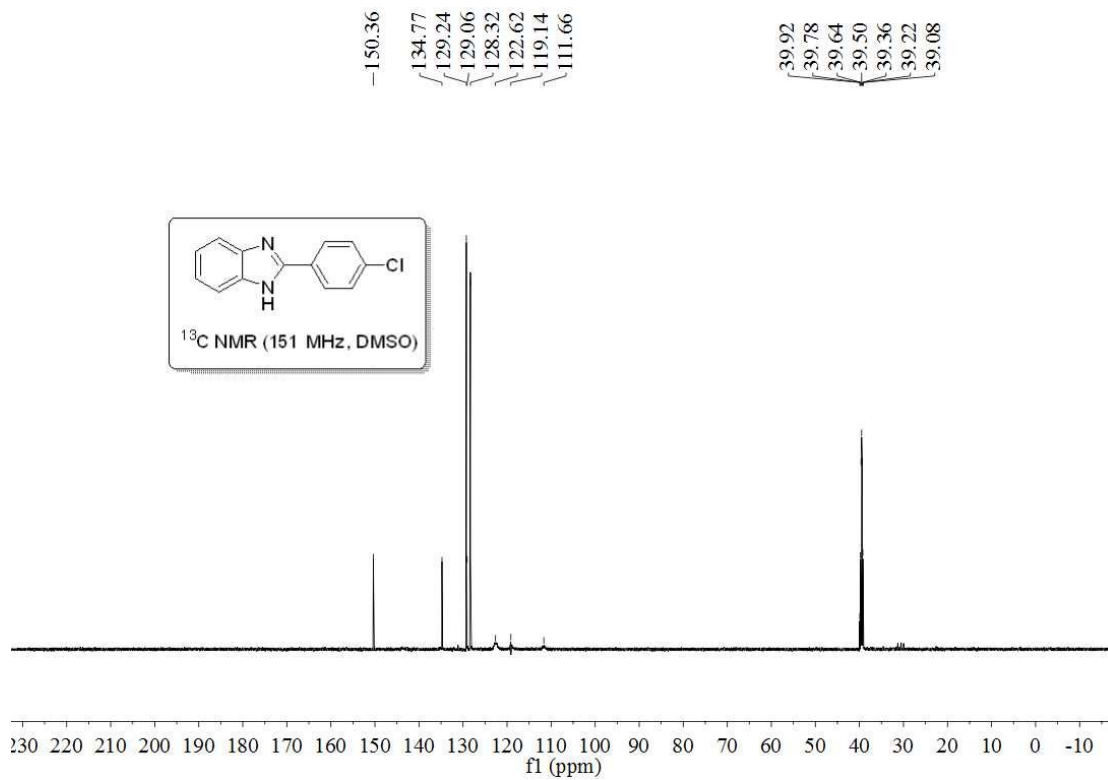

## 2-(4-bromophenyl)-1H-benzo[d]imidazole (4f)

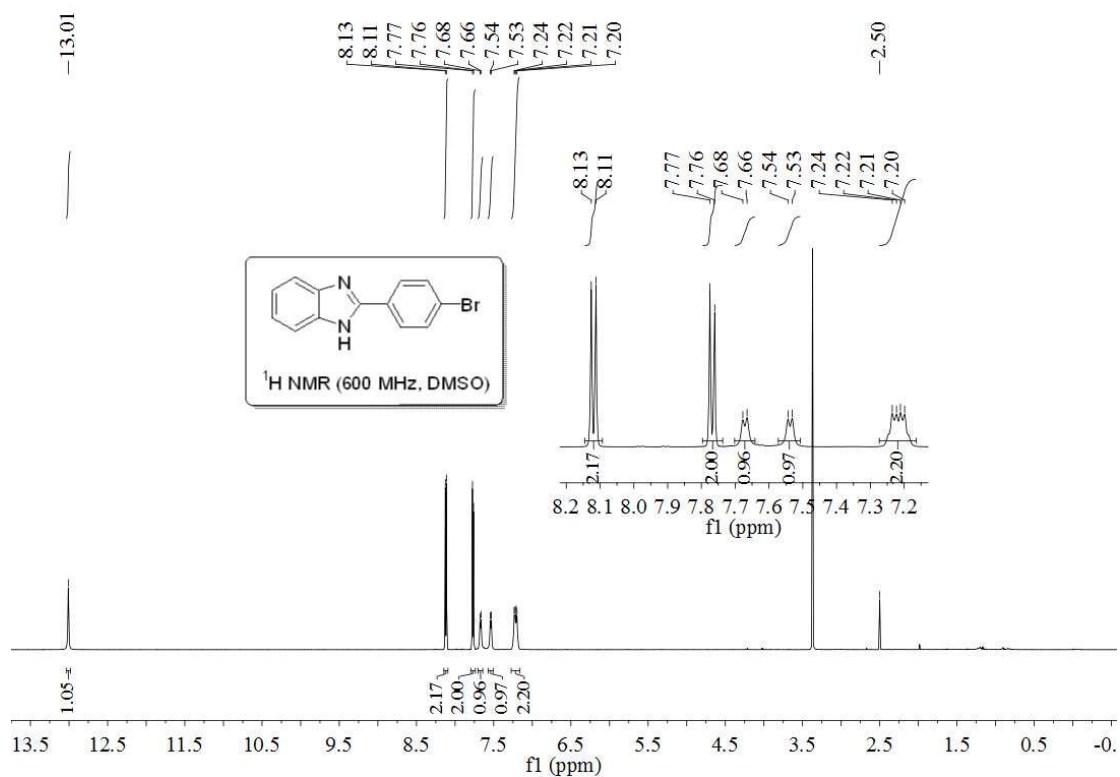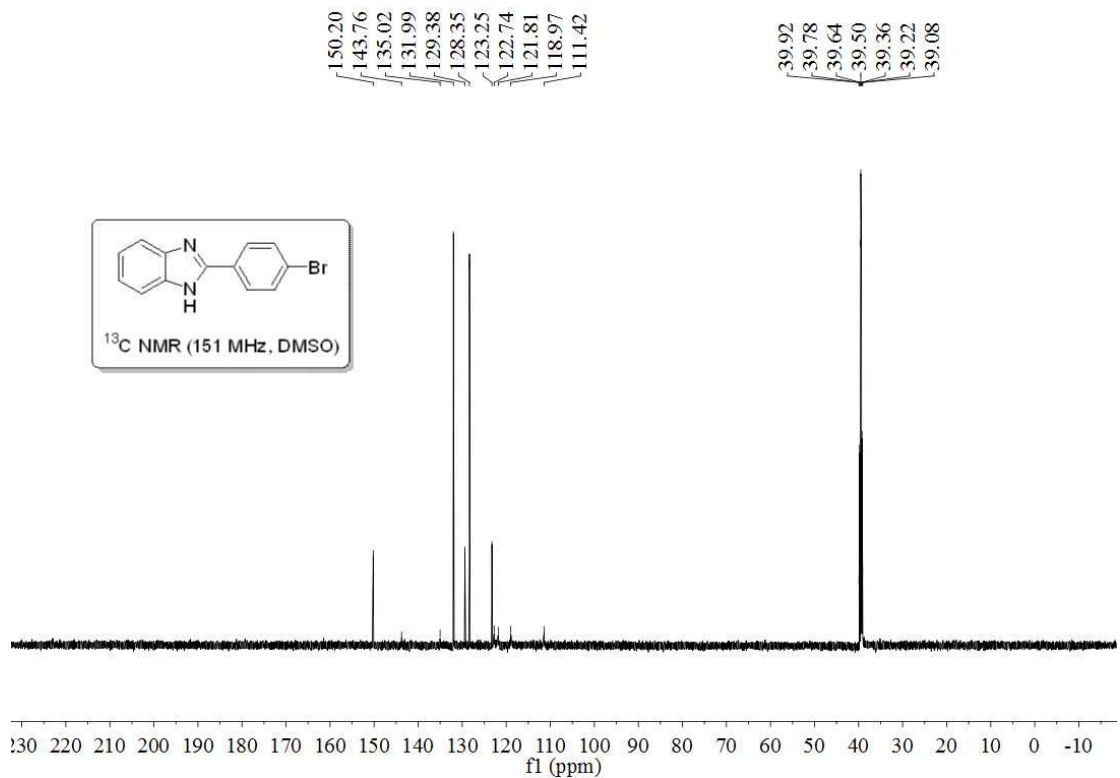

## 2-(naphthalen-2-yl)-1H-benzo[d]imidazole (4g)

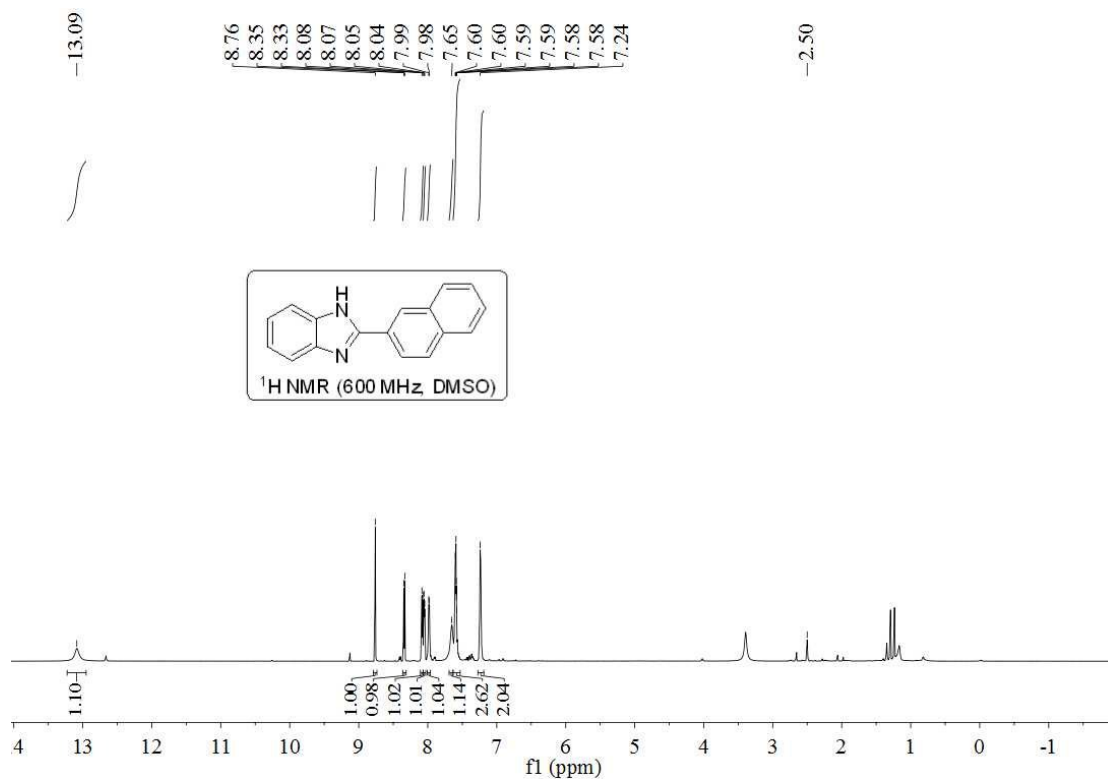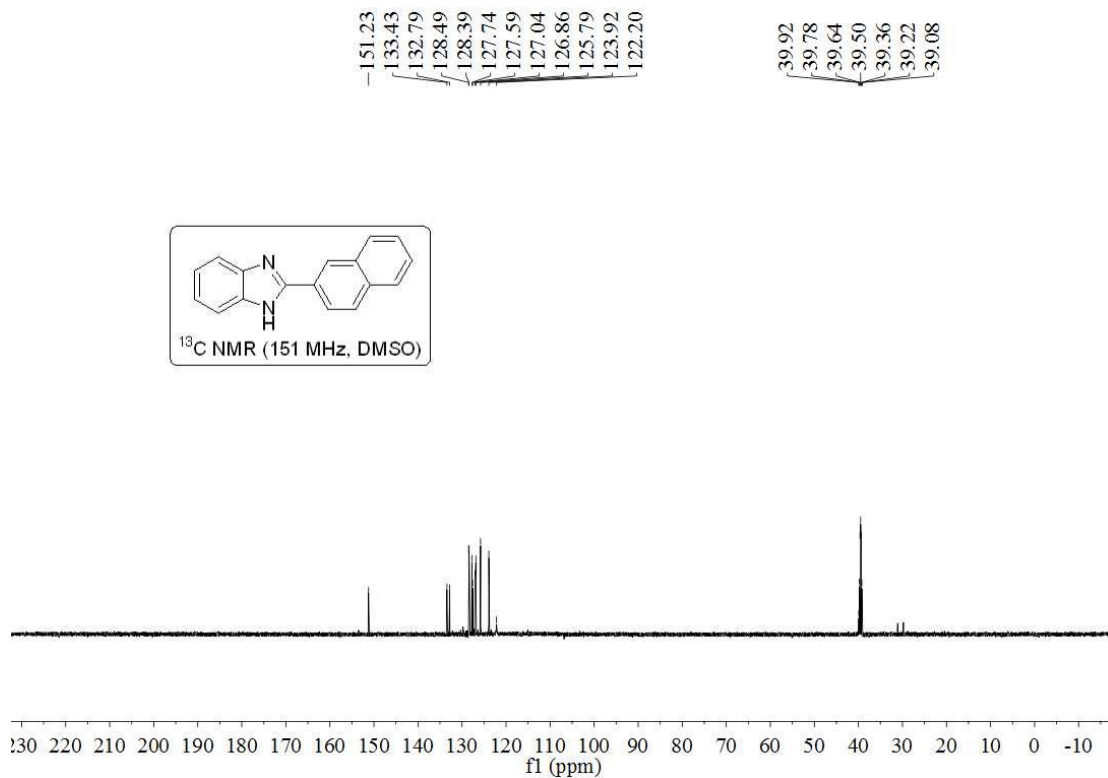

## 2-methyl-1H-benzo[d]imidazole (4h)

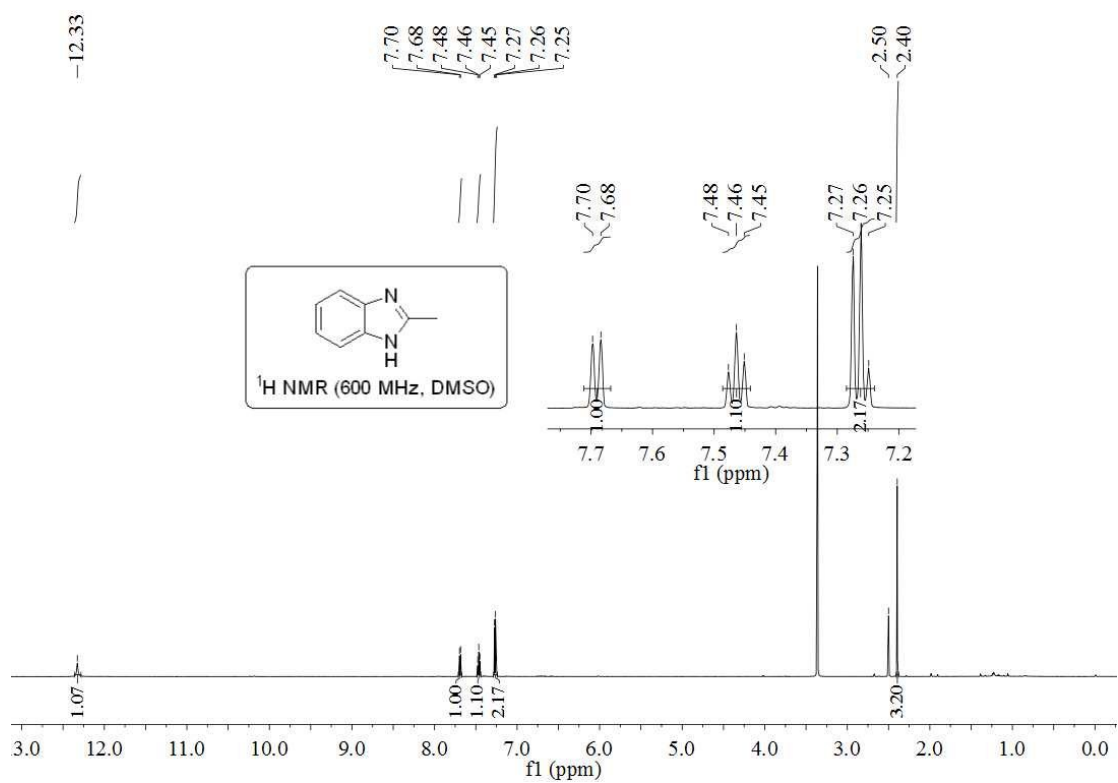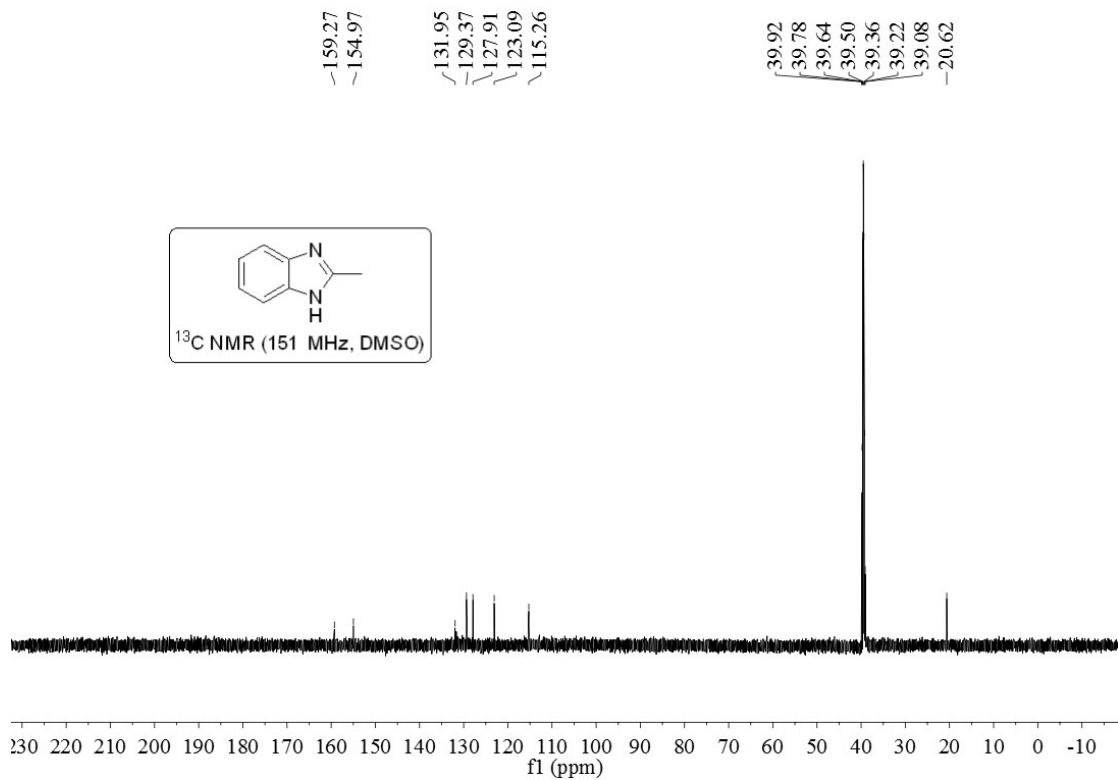



## 2-(tert-butyl)-1H-benzo[d]imidazole (4i)

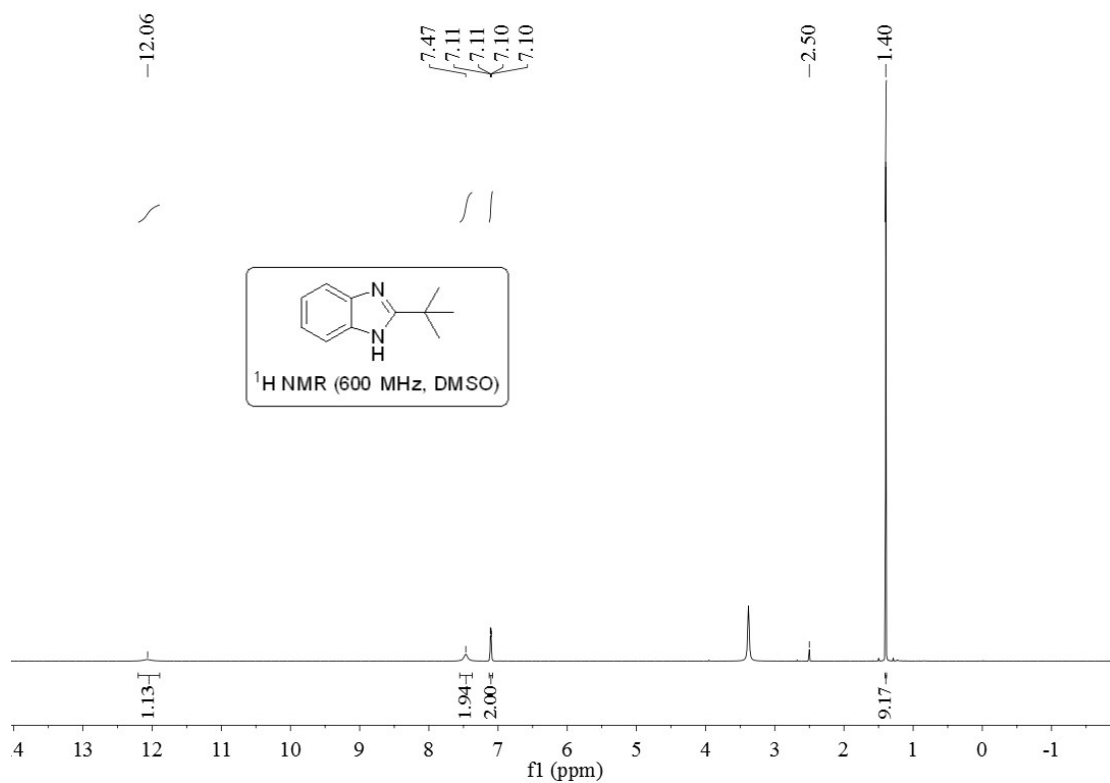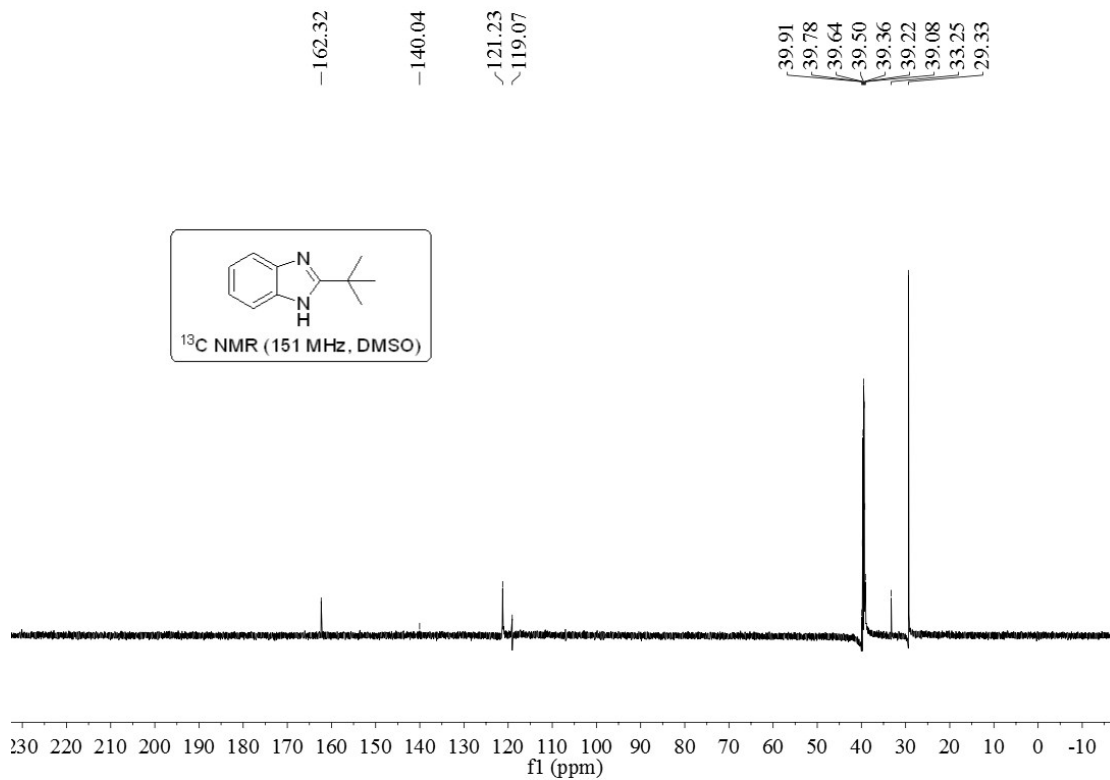

Supplement: c6ob01963c1.pdf [file c6ob01963c1.pdf]
